# Supplementary material
Source: PubMed Central journal article supplement (PMC6065102)
Supplement: NIHMS982701-supplement-Appendix.pdf [file NIHMS982701-supplement-Appendix.pdf]

## Supplementary Appendix

This appendix has been provided by the authors to give readers additional information about their work.

Supplement to: Desjardins A, Gromeier M, Herndon II JE, et al. Recurrent glioblastoma treated with recombinant poliovirus. *N Engl J Med*. DOI: 10.1056/NEJMoa1716435

## SUPPLEMENTARY APPENDIX

### TABLE OF CONTENTS

|                                                                                                                                                                      |    |
|----------------------------------------------------------------------------------------------------------------------------------------------------------------------|----|
| 1) Table of Contents                                                                                                                                                 | 2  |
| 2) Supplementary Text - Supplementary Methods                                                                                                                        | 3  |
| 3) Table S1 - Inclusion and exclusion criteria for NCT01491893                                                                                                       | 8  |
| 4) Table S2 - PVSRIPO dose expansion patients (dose levels -2, -1, 2) with adverse events attributable to bevacizumab among patients who received bevacizumab (N=34) | 10 |
| 5) Table S3 - PVSRIPO patients experiencing an adverse event during dose-escalation (Dose Levels 1-5) and dose expansion (Dose Exp)                                  | 11 |
| 6) Table S4 - PVSRIPO patient prognostic, treatment and survival information                                                                                         | 17 |
| 7) Figure S1 - CD155 immunohistochemistry in tumor tissues resected prior to enrollment of 43 out of 61 patients in the PVSRIPO trial                                | 21 |
| 8) Figure S2 - Serum anti-poliovirus (type 1) neutralizing antibody titers                                                                                           | 22 |
| 9) Figure S3 - Survival of PVSRIPO patients and the historical control cohort excluding biopsy-only patients                                                         | 26 |
| 10) Figure S4 - Survival according to lesion cross-sectional area                                                                                                    | 27 |
| 11) Figure S5 - Survival according to KPS                                                                                                                            | 28 |
| 12) Figure S6 - Survival according to bevacizumab use                                                                                                                | 29 |
| 13) Figure S7 - MRIs from patient 50 (dose level -2)                                                                                                                 | 30 |
| 14) Figure S8 - MRIs from patient 2 (dose level 2)                                                                                                                   | 31 |
| 15) Figure S9 - MRIs from patient 22 (dose level -1)                                                                                                                 | 32 |
| 16) Figure S10 - MRIs from patient 16 (dose level -1)                                                                                                                | 33 |
| 17) Figure S11 - Flair images from patient 1, 2, 8, 16, 22 and 50                                                                                                    | 34 |
| 18) Supplementary References                                                                                                                                         | 37 |

## SUPPLEMENTARY METHODS

### Study Design

Patients received a boost immunization with trivalent inactivated poliovirus (IPOL™; Sanofi-Pasteur, Swiftwater, PA) at least one week prior to PVSRIPO administration. Neutralizing anti-poliovirus (type 1) antibody titers were monitored in all study subjects from the time of enrollment until at least 56 days post PVSRIPO; additionally, shedding of infectious PVSRIPO with stool was tested in all patients (see below section **Analyses of serum anti-poliovirus type 1 neutralizing antibodies and of virus shedding with stool**). For confirmation of viable malignant glioma and for genomic analyses of tumors, a stereotactic biopsy was performed prior to PVSRIPO infusion. Only a stereotactic biopsy was obtained with no additional tumor resection. Immediately after biopsy, a catheter [Vygon PIC-030 (Sophysa, Inc.; Crown Point, IN)] was implanted into the tumor. The location of the catheter implantation was selected by the operating neurosurgeon with the assistance of iPlan Flow (BrainLAB, Westchester, IL). To avoid PVSRIPO leakage into ventricles, the inserted catheter tip was at least 1 cm away from ventricles.

PVSRIPO was manufactured by the Biopharmaceutical Development Program/SAIC at the National Cancer Institute (NCI)-Frederick. Patients were infused with PVSRIPO by CED over 6.5 hours at a rate of 500 µL/hr using a Medfusion 3500 or 3010 (Smiths Medical ASD, Inc, Minneapolis, MN) infusion pump along with the infusion catheter and infusion tubing (PIT 400, Sophysa, Inc). The volume of the delivered inoculum was 3.25 mL. Patients underwent MRI imaging within 4 hours of completion of infusion to define the shape and dissemination of the infusate relative to the patients' brain anatomy. To this end, gadolinium-diethylene triamine pentaacetic acid (Gd-DTPA) contrast agent was co-infused with PVSRIPO.

### Statistical Design

#### Continual Reassessment Method Model

In this trial, the starting dose of PVSRIPO was  $1 \times 10^8$  tissue culture infectious dose (TCID<sub>50</sub>), which is 1/10<sup>th</sup> of the highest non-toxic dose in non-human primates (NHPs) in the definitive, IND-directed toxicology study and 1/50<sup>th</sup> of the highest non-toxic dose in NHPs in the dose-range-finding toxicology study<sup>1</sup>.

Dose escalation followed a two-step continual reassessment method (CRM) design that included an escalation step and a model-guided step<sup>2,3</sup>. In the escalation period, dose levels

(DL) were rapidly escalated as preclinical data suggested that dose-limiting toxicity (DLT) would not occur at any of the five DLs evaluated<sup>4</sup>. Decisions concerning dose escalation for subsequent patients were based upon the occurrence of DLT during the first 4 weeks after treatment administration.

Beginning at DL 1 ( $1.0 \times 10^8$  TCID<sub>50</sub>), one patient was treated at each DL, up to DL 5 ( $1.0 \times 10^{10}$  TCID<sub>50</sub>). Plan was for a total of 21 patients to be treated on DL 5. The DLs were as follows, DL 1 -  $1.0 \times 10^8$  TCID<sub>50</sub>, DL 2 -  $3.3 \times 10^8$  TCID<sub>50</sub>, DL 3 -  $1.0 \times 10^9$  TCID<sub>50</sub>, DL 4 -  $3.3 \times 10^9$  TCID<sub>50</sub>, and DL 5 -  $1.0 \times 10^{10}$  TCID<sub>50</sub>. The escalation step was halted if a patient assigned to one of the first 4 DLs or more than 20% of patients treated at DL 5 experienced a DLT. In that case, further dose escalation or de-escalation was to be guided by the likelihood-based implementation of the CRM, in which the one-parameter hyperbolic tangent model was used to estimate the probability of DLT at each of the 5 dose levels based upon available data<sup>5</sup>. The highest DL for which this estimated probability is less than 20% was to be identified. If this optimal dose was less than or the same as the current dose, subsequent patients were to be treated at that DL. If greater than the current dose, subsequent patients were to be treated at one DL higher than the current dose. The optimal dose was to be recomputed whenever the status of DLT has been determined for a patient.

### **Statistical Modification and Dose Expansion**

The fourth patient treated on DL 5 experienced a DLT that prompted a dose reduction to DL 4 for subsequent patients. After one additional patient was treated on DL 4, the dose escalation portion of the study was terminated and a dose expansion portion was initiated at DL 2. This dose reduction was not due to concern for DLT, but due to the observation that some patients treated on the higher DLs experienced localized tumor inflammation requiring prolonged steroid use. Six additional patients were treated on DL 2. The dose was further reduced to DL -1,  $5.0 \times 10^7$  TCID<sub>50</sub>, with the goal of further reducing difficulties with steroid tapering. Twenty-four patients were treated at that DL before it was further reduced to DL -2,  $1.0 \times 10^7$  TCID<sub>50</sub>. Fifteen patients were treated on DL -2 before the study team re-escalated to DL -1. Seven additional patients were treated on this study at DL -1, for a total of 31 patients treated on DL -1. A total of 61 patients were treated with PVSRIPO across all DLs.

In describing the adverse events for PVSRIPO patients, the highest-grade event of each type of event experienced was summarized. Overall survival was defined as the time of PVSRIPO

infusion until death. For patients alive at the time of analysis, survival time was censored at the date of last follow-up. No PVSRIPO patients were lost to follow-up. For the PVSRIPO patients and the historical controls, the Kaplan-Meier estimator was used to describe the distribution of survival time. SAS 9.4 was used for all analyses.

### **Historical Control Group**

We identified a historical control group of patients previously treated at our institution who would have been eligible for the PVSRIPO study if the study had been available at the time of their disease progression. We felt that the identification of a historical control group was the best compromise to evaluate survival, given that treating patients with a sham saline CED infusion would be unethical and given concerns for patient dropout if randomized to the control arm. We felt that the identification of a historical control was necessary because a comparison to recently reported phase III study results of an approved modality, like NovoTTF<sup>6</sup>, would be confounded by the fact that enrollment on such studies was not based on the enrollment criteria specific to the PVSRIPO study (e.g. limitation in tumor volume and steroid dosage). Since recently reported studies of effective immunotherapeutic agents showed 1) delayed antitumor effects and, hence, delayed separation of survival curves, and 2) a percentage of patients who survived for extended periods, we focused on evaluating long-term survivorship at a specific time point (i.e. 24 months). Within the historical control group, the 24-month survival probability was 13.5%. Assuming 27 patients treated at DL -1, simulation studies showed that a two-tailed chi-square test ( $\alpha=0.2$ ) conducted to compare the proportion of patients alive at 24 months at the 0.2 level has 88.7% power to detect an increase to 35% in 24-month survival. The Kaplan-Meier estimator was used to describe the distribution of survival time.

The historical cohort used for the evaluation of PVSRIPO efficacy among WHO grade IV malignant glioma patients was derived from the Primary and Recurrent Glioma Registry (PRoGREss; Duke IRB# Pro00027120). The PRoGREss registry contains medical information of all patients diagnosed after 12/31/2004 with a primary CNS tumor who were seen at Duke University Medical Center's Preston Robert Tisch Brain Tumor Center (PRTBTC). Specifically, that database includes: (1) retrospective data from all patients diagnosed after 12/31/2004, but deceased as of 11/3/2011, and (2) data collected retrospectively and prospectively from patients who were alive as of 11/3/2011 and provided registry consent. Both demographic and clinical information was extracted from clinical and research records, which includes such information

as diagnosis, gender, medical history, medications, disease progression, types of treatment, and survival.

To create the historical control cohort, data available from the PRoGREss registry as of 12/15/2014 were reviewed. All recurrent WHO grade IV malignant glioma patients treated at Duke from 1/01/2007 to 12/15/2014 were reviewed to determine potential eligibility on the phase I PVSRIPO trial, had the trial been available during that time period. All radiologic records were reviewed by a study investigator (A.D.) without knowledge of the patient's survival outcome.

Patients deemed eligible from an MRI standpoint were then selected for inclusion in the historical control group based on the following criteria: patients must have a diagnosis of recurrent supratentorial WHO Grade IV malignant glioma based on imaging studies with measurable disease ( $\geq 1$  cm and  $\leq 5.5$  cm of contrast-enhancing tumor), age  $\geq 18$  years, must not have taken part in the PVSRIPO study, KPS  $\geq 70$  at the time the patient could have been enrolled in the PVSRIPO study, absence of rapid clinical decline, and a steroid limit of  $\leq 4$  mg per day of dexamethasone (or equivalent) within 2 weeks prior to being eligible for PVSRIPO infusion. Survival time was computed as the time between the date of the first MRI at which time the patient would have been eligible to receive PVSRIPO and the date of death. If the patient remained alive at the time of analysis, survival time was censored at the date of last follow-up.

### **Toxicity Evaluation**

Events associated with the biopsy procedure or catheter placement (unless grade 3 or higher), seizures, new neurologic deficits ascribed to histopathology-proven tumor progression, thromboembolism, Syndrome of Inappropriate Antidiuretic Hormone (SIADH), complications from corticosteroids (steroid myopathy, weight gain, etc.) and tumor progression were not considered DLTs.

### **Imaging Analysis**

An exploratory objective of this study was to describe changes visualized on imaging after PVSRIPO inoculation to assist with developing imaging response classification criteria specific to PVSRIPO for future studies. Potent proinflammatory responses to PVSRIPO tumor infection in immunodeficient<sup>7</sup> or immunocompetent<sup>8</sup> rodent tumor models, indicated that patient imaging would reveal an inflammatory reaction. Magnetic resonance imaging (MRI) was obtained at screening, within 4 hours after completion of infusion, 4 and 8 weeks after the completion of the

infusion, followed by every 8 weeks for one year, and afterward at an interval selected by the treating physician. Radiographic Assessment Forms were filled out and reviewed by a study investigator for each MRI. This included enhancing tumor measurements, change in size from baseline and nadir, extent of FLAIR signal abnormalities, presence of new disease, steroid dose, and clinical status, among other information.

### **IDH1(R132H) and CD155 immunohistochemistry, and MGMT promoter methylation assay**

CD155 immunohistochemistry (IHC) was not an enrollment criterion for PVSRIPO for practical and scientific reasons. Such a test would unduly delay virus infusion after catheter installation. We recently reported positive CD155 IHC in 62 out of 63 cases of glioblastoma<sup>9</sup>. Immunohistochemistry of CD155 on formalin-fixed, paraffin-embedded tissue specimens was performed as reported recently<sup>9</sup>. Immunoperoxidase staining and detection of IDH1 was performed on formalin-fixed, paraffin-embedded tissue specimens. Sections were deparaffinized in xylene, rehydrated, and placed in the Dako PT module where they were heated at 100°C in Envision Flex Target Retrieval Solution (low pH; 20 min). The sections were washed in Dako wash buffer (5 min) and incubated with the mIDH1R132H (Dianova, Hamburg, Germany) monoclonal antibody (mouse IgG, diluted 1:60) that specifically recognizes IDH1(R132H) using the Dako LINKS platform. The DAKO Link Kit was used for the post-primary antibody blocker, Dako (HRP) Labeled Envision Flex Mouse Plus as the detection, Dako DAB+ as the chromogen, and Hematoxylin as the counterstain. The expression of IDH1-R132H was determined by semi-quantitatively assessing the proportion of positively stained tumor cells. MGMT promoter methylation was analyzed by quantitative methylation-specific polymerase chain reaction using sample DNA extracted from formalin-fixed, paraffin-embedded (FFPE) specimens (LabCorp, Burlington, NC).

### **Analyses of serum anti-poliovirus type 1 neutralizing antibodies and of virus shedding with stool**

Anti-poliovirus type 1 neutralizing antibody titers were determined in serum samples from all patients at defined intervals: at the time of enrollment, the day prior to PVSRIPO infusion (day - 1), and days 7, 14, 28, 56 post PVSRIPO infusion. We used the enhanced plaque neutralization method described by Boone et al.<sup>10</sup> for our analyses. Virus shedding with stool was tested at days 7, 14, 28 and 56 post PVSRIPO infusion for patients 1-7, and at day 56 post PVSRIPO infusion for all remaining patients treated with PVSRIPO. We used previously published methods for detecting infectious PVSRIPO in stool samples from non-human primates<sup>1</sup>.

**Table S1. Inclusion and exclusion criteria for NCT01491893.**

| Inclusion Criteria                                                                                                                                                                                                                                                                                                                                                                                                                                                                                                                                                                                                                                                                                                                                                                                                                                                                                                                                                                                                                                                                                                                                                                                                                                                                                                                                                                                                                                                                                                                                                                                                                                                                                                                                                                                                                                                                                                               | Exclusion Criteria                                                                                                                                                                                                                                                                                                                                                                                                                                                                                                                                                                                                                                                                                                                                                                                                                                                                                                                                                                                                                                                                                                                                                                                                                                                                                                                                                                                                                                                                                                                                                                                                                                                                                                                                                                                                                                                                                                                                                                                                                                                                                                                                                                                        |
|----------------------------------------------------------------------------------------------------------------------------------------------------------------------------------------------------------------------------------------------------------------------------------------------------------------------------------------------------------------------------------------------------------------------------------------------------------------------------------------------------------------------------------------------------------------------------------------------------------------------------------------------------------------------------------------------------------------------------------------------------------------------------------------------------------------------------------------------------------------------------------------------------------------------------------------------------------------------------------------------------------------------------------------------------------------------------------------------------------------------------------------------------------------------------------------------------------------------------------------------------------------------------------------------------------------------------------------------------------------------------------------------------------------------------------------------------------------------------------------------------------------------------------------------------------------------------------------------------------------------------------------------------------------------------------------------------------------------------------------------------------------------------------------------------------------------------------------------------------------------------------------------------------------------------------|-----------------------------------------------------------------------------------------------------------------------------------------------------------------------------------------------------------------------------------------------------------------------------------------------------------------------------------------------------------------------------------------------------------------------------------------------------------------------------------------------------------------------------------------------------------------------------------------------------------------------------------------------------------------------------------------------------------------------------------------------------------------------------------------------------------------------------------------------------------------------------------------------------------------------------------------------------------------------------------------------------------------------------------------------------------------------------------------------------------------------------------------------------------------------------------------------------------------------------------------------------------------------------------------------------------------------------------------------------------------------------------------------------------------------------------------------------------------------------------------------------------------------------------------------------------------------------------------------------------------------------------------------------------------------------------------------------------------------------------------------------------------------------------------------------------------------------------------------------------------------------------------------------------------------------------------------------------------------------------------------------------------------------------------------------------------------------------------------------------------------------------------------------------------------------------------------------------|
| <ul style="list-style-type: none"> <li>• Recurrent supratentorial WHO Grade IV Malignant Glioma based on imaging studies with measurable disease (<math>\geq 1</math> cm and <math>\leq 5.5</math> cm of contrast-enhancing tumor). Prior histopathology consistent with a WHO Grade IV Malignant Glioma.</li> <li>• Adults <math>\geq 18</math> years of age.</li> <li>• Karnofsky Performance Score (KPS) of <math>\geq 70\%</math>.</li> </ul> <p><b>Lab values prior to biopsy:</b></p> <ul style="list-style-type: none"> <li>• Neutrophil count <math>\geq 1000</math>.</li> <li>• Hemoglobin <math>\geq 9</math>.</li> <li>• Prothrombin and Partial Thromboplastin Times <math>\leq 1.2</math> x normal.</li> <li>• Creatinine <math>\leq 1.2</math> x normal.</li> <li>• Total bilirubin, SGOT, SGPT, alkaline phosphatase <math>\leq 2.5</math> x normal.</li> </ul> <p><b>Requirements:</b></p> <ul style="list-style-type: none"> <li>• Platelet count <math>\geq 125,000/\mu\text{L}</math> prior to tumor biopsy.</li> <li>• Platelets <math>\geq 100,000/\mu\text{L}</math> prior to PVSRIPO infusion.</li> <li>• Positive serum anti-poliovirus titer prior to biopsy.</li> <li>• Received a boost immunization with trivalent inactivated IPOL™ (Sanofi-Pasteur) at least 1 week prior to administration of the study agent.</li> <li>• At the time of biopsy, prior to administration of virus, the presence of recurrent tumor must have been confirmed by histopathological analysis.</li> <li>• Able to undergo brain MRI with and without contrast.</li> <li>• A signed informed consent form approved by the Duke University Institutional Review Board (IRB) will be required for patient enrollment into the study. Able to read and understand the informed consent document and must sign the informed consent indicating that they are aware of the investigational nature of this study.</li> </ul> | <ul style="list-style-type: none"> <li>• Females who are pregnant or breast-feeding during the study period.</li> <li>• Adults of reproductive potential not employing an effective method of birth control will be excluded.</li> <li>• Prior, unrelated malignancy that required active treatment with the exception of cervical carcinoma in situ and adequately treated basal cell or squamous cell carcinoma of the skin.</li> <li>• An impending, life-threatening cerebral herniation syndrome, based on the assessment of the study neurosurgeons or their designate.</li> </ul> <p><b>Because the potential toxicities from the agent being studied may be similar to some known diseases or may be more dangerous in the context of certain known diseases, patients with the following were excluded to avoid confounding the study results:</b></p> <ul style="list-style-type: none"> <li>• An active infection requiring intravenous treatment or having an unexplained febrile illness (<math>T_{\text{max}} &gt; 99.5</math> F/<math>37.5</math> C)</li> <li>• Known immunosuppressive disease or known human immunodeficiency virus infection.</li> <li>• An unstable or severe intercurrent medical condition such as severe heart (New York Heart Association Class 3 or 4) or known lung (<math>FEV1 &lt; 50\%</math>) disease, uncontrolled diabetes mellitus.</li> <li>• A known albumin allergy.</li> <li>• A known Gadolinium allergy.</li> <li>• History of neurological complications due to poliovirus infection.</li> </ul> <p><b>Patients who had not recovered from the toxic effects of prior chemotherapy and/or radiation therapy were excluded according to the following criteria:</b></p> <ul style="list-style-type: none"> <li>• Chemotherapy or bevacizumab <math>&lt; 4</math> weeks [except for nitrosourea (6 weeks) or metronomic dosed chemotherapy such as daily etoposide or cyclophosphamide (1 week)] prior to starting the study drug unless recovered from side effects of such therapy.</li> <li>• Immunotherapy <math>&lt; 4</math> weeks prior to starting the study drug unless patient has recovered from side effects of such therapy.</li> </ul> |



|  |                                                                                                                                                                                                                                                                                                                                                                                                                                                                                                                                                                                                                                                                                                                                                                                                                                                                                                                                                                                                                                                                                                                                                                                                                                                                                                                         |
|--|-------------------------------------------------------------------------------------------------------------------------------------------------------------------------------------------------------------------------------------------------------------------------------------------------------------------------------------------------------------------------------------------------------------------------------------------------------------------------------------------------------------------------------------------------------------------------------------------------------------------------------------------------------------------------------------------------------------------------------------------------------------------------------------------------------------------------------------------------------------------------------------------------------------------------------------------------------------------------------------------------------------------------------------------------------------------------------------------------------------------------------------------------------------------------------------------------------------------------------------------------------------------------------------------------------------------------|
|  | <ul style="list-style-type: none"><li>• Less than 12 weeks from radiation therapy, unless progressive disease outside of the radiation field or 2 progressive scans at least 4 weeks apart or histopathologic confirmation.</li></ul> <p><b>Patients who had not completed all standard of care treatments including surgical procedure, and radiation therapy (at least 59 Gy):</b></p> <ul style="list-style-type: none"><li>• If MGMT promoter unmethylated, patients did not have to have received chemotherapy prior to participating in this trial.</li><li>• If MGMT promoter methylated or MGMT promoter methylation status was unknown at the time of screening, patients must have received at least one chemotherapy regimen prior to participating in this trial.</li><li>• Radiological evidence of active (growing) multifocal disease, tumors extending into or crossing the corpus callosum or leptomeningeal disease.</li><li>• Undetectable anti-tetanus toxoid IgG.</li><li>• Known history of agammaglobulinemia.</li><li>• On greater than 4 mg per day of dexamethasone within the 2 weeks prior to admission for PVSRIPO infusion.</li><li>• Worsening steroid myopathy (history of gradual progression of bilateral proximal muscle weakness, and atrophy of proximal muscle groups).</li></ul> |
|--|-------------------------------------------------------------------------------------------------------------------------------------------------------------------------------------------------------------------------------------------------------------------------------------------------------------------------------------------------------------------------------------------------------------------------------------------------------------------------------------------------------------------------------------------------------------------------------------------------------------------------------------------------------------------------------------------------------------------------------------------------------------------------------------------------------------------------------------------------------------------------------------------------------------------------------------------------------------------------------------------------------------------------------------------------------------------------------------------------------------------------------------------------------------------------------------------------------------------------------------------------------------------------------------------------------------------------|

**Table S2. PVSRIPO dose expansion patients (dose levels -2, -1, 2) with adverse events attributable to bevacizumab among the patients who received bevacizumab (N=34).**

| Adverse Event                                               | Grade of Adverse Event |         |        |        |        |
|-------------------------------------------------------------|------------------------|---------|--------|--------|--------|
|                                                             | 1                      | 2       | 3      | 4      | 5      |
| <b>Blood and lymphatic system disorders</b>                 |                        |         |        |        |        |
| Anemia                                                      | 5 (15%)                | -       | -      | -      | -      |
| <b>Gastrointestinal (GI) disorders</b>                      |                        |         |        |        |        |
| Colitis                                                     | -                      | 1 (3%)  | -      | -      | -      |
| Gingivitis                                                  | 1 (3%)                 | -       | -      | -      | -      |
| Hemorrhoids                                                 | -                      | 1 (3%)  | -      | -      | -      |
| Lower GI hemorrhage                                         | 1 (3%)                 | -       | -      | -      | -      |
| Nausea                                                      | 2 (6%)                 | -       | -      | -      | -      |
| Vomiting                                                    | 1 (3%)                 | -       | -      | -      | -      |
| <b>General disorders and administration site conditions</b> |                        |         |        |        |        |
| Infusion related reaction                                   | -                      | 1 (3%)  | -      | -      | -      |
| <b>Infections and infestations</b>                          |                        |         |        |        |        |
| Upper respiratory infection                                 | 1 (3%)                 | -       | -      | -      | -      |
| <b>Investigations</b>                                       |                        |         |        |        |        |
| Creatinine increased                                        | 6 (18%)                | -       | -      | -      | -      |
| Leukopenia                                                  | 4 (12%)                | 2 (6%)  | -      | -      | -      |
| Lymphopenia                                                 | -                      | 1 (3%)  | -      | -      | -      |
| Neutropenia                                                 | 1 (3%)                 | 1 (3%)  | 1 (3%) | -      | -      |
| Thrombocytopenia                                            | 3 (9%)                 | -       | -      | -      | -      |
| <b>Musculoskeletal and connective tissue disorders</b>      |                        |         |        |        |        |
| Arthralgia                                                  | 4 (12%)                | -       | -      | -      | -      |
| <b>Nervous system disorders</b>                             |                        |         |        |        |        |
| Headache                                                    | -                      | 2 (6%)  | -      | -      | -      |
| Intracranial hemorrhage                                     | -                      | 1 (3%)  | -      | -      | 2 (6%) |
| <b>Renal and urinary disorders</b>                          |                        |         |        |        |        |
| Hematuria                                                   | 1 (3%)                 | -       | -      | -      | -      |
| Proteinuria                                                 | 3 (9%)                 | -       | 1 (3%) | -      | -      |
| <b>Respiratory, thoracic and mediastinal disorders</b>      |                        |         |        |        |        |
| Epistaxis                                                   | 1 (3%)                 | -       | -      | -      | -      |
| Nasal congestion                                            | 2 (6%)                 | -       | -      | -      | -      |
| Postnasal drip                                              | 3 (9%)                 | -       | -      | -      | -      |
| <b>Vascular disorders</b>                                   |                        |         |        |        |        |
| Hypertension                                                | 2 (6%)                 | 7 (21%) | 1 (3%) | -      | -      |
| Thromboembolic event                                        | -                      | 1 (3%)  | 3 (9%) | -      | -      |
| <b>Total Patients with an Event*</b>                        | 11 (32%)               | 9 (26%) | 3 (9%) | 0 (0%) | 2 (6%) |

\*Each patient is included only once in the Total row under the grade level representing their highest-grade event.

**Table S3. PVSRIPO patients experiencing an adverse event during dose-escalation (Dose Levels 1-5) and dose expansion (Dose Exp)\*.**

| Body System                          | Adverse Event                       | Grade   | PVSRIPO Dose Escalation<br>Dose Level |         |         |         |         | Dose Exp<br>(N=52) |
|--------------------------------------|-------------------------------------|---------|---------------------------------------|---------|---------|---------|---------|--------------------|
|                                      |                                     |         | 1 (N=1)                               | 2 (N=1) | 3 (N=1) | 4 (N=2) | 5 (N=4) |                    |
| Blood and lymphatic system disorders | Anemia                              | Grade 1 | 1                                     | -       | 1       | 2       | 3       | 32                 |
|                                      |                                     | Grade 2 | -                                     | -       | -       | -       | -       | 2                  |
| Cardiac disorders                    | Cardiac arrhythmia                  | Grade 1 | -                                     | -       | -       | -       | -       | 1                  |
|                                      |                                     | Grade 2 | -                                     | -       | -       | -       | -       | 1                  |
| Ear and labyrinth disorders          | Ear and labyrinth disorders - Other | Grade 1 | -                                     | -       | -       | -       | -       | 2                  |
|                                      | Hearing impaired                    | Grade 1 | -                                     | -       | -       | -       | -       | 2                  |
|                                      | Tinnitus                            | Grade 1 | -                                     | -       | -       | -       | -       | 1                  |
|                                      | Vertigo                             | Grade 1 | -                                     | -       | -       | -       | -       | 3                  |
| Endocrine disorders                  | Cushingoid                          | Grade 1 | -                                     | -       | -       | -       | 1       | 2                  |
|                                      |                                     | Grade 2 | -                                     | -       | -       | 1       | -       | 1                  |
|                                      | Diabetes                            | Grade 2 | -                                     | 1       | -       | -       | -       | -                  |
| Eye disorders                        | Blurred vision                      | Grade 1 | -                                     | -       | -       | -       | 1       | 5                  |
|                                      | Diplopia                            | Grade 1 | -                                     | -       | -       | -       | -       | 3                  |
|                                      | Eye disorders - Other               | Grade 1 | -                                     | -       | -       | -       | -       | 2                  |
|                                      | Farsighted                          | Grade 1 | -                                     | -       | -       | -       | -       | 2                  |
|                                      | Focusing difficulty                 | Grade 1 | -                                     | -       | -       | -       | -       | 1                  |
|                                      | Strabismus                          | Grade 1 | -                                     | -       | -       | -       | -       | 1                  |
|                                      | Visual field cut - hemianopia       | Grade 1 | -                                     | -       | -       | -       | -       | 10                 |
|                                      |                                     | Grade 2 | -                                     | -       | -       | -       | -       | 2                  |
| Gastrointestinal disorders           | Abdominal pain                      | Grade 1 | -                                     | -       | -       | -       | -       | 1                  |
|                                      | Cholelithiasis                      | Grade 1 | -                                     | -       | -       | -       | -       | 1                  |
|                                      | Colitis                             | Grade 2 | -                                     | -       | -       | -       | -       | 1                  |
|                                      | Constipation                        | Grade 1 | -                                     | -       | -       | -       | -       | 12                 |
|                                      |                                     | Grade 2 | -                                     | -       | -       | -       | -       | 1                  |
|                                      | Diarrhea                            | Grade 1 | -                                     | 1       | -       | -       | -       | 8                  |
|                                      |                                     | Grade 2 | -                                     | -       | 1       | -       | -       | 1                  |
|                                      | Dry mouth                           | Grade 1 | -                                     | -       | -       | 1       | -       | 1                  |
|                                      | Dysphagia                           | Grade 1 | -                                     | -       | -       | 1       | -       | -                  |
|                                      | Enterocolitis                       | Grade 1 | -                                     | -       | -       | -       | -       | 2                  |
|                                      |                                     | Grade 2 | -                                     | -       | -       | -       | -       | 1                  |
|                                      | Fecal incontinence                  | Grade 1 | -                                     | -       | 1       | -       | -       | 2                  |
|                                      | Gastroesophageal reflux/disease     | Grade 1 | 1                                     | -       | -       | -       | -       | 1                  |
|                                      |                                     | Grade 2 | -                                     | -       | -       | -       | -       | 1                  |
|                                      | Gingivitis                          | Grade 1 | -                                     | -       | -       | -       | -       | 2                  |
| Hemorrhoids                          | Grade 1                             | -       | -                                     | -       | -       | 1       | -       |                    |
|                                      | Grade 2                             | -       | -                                     | -       | -       | -       | 1       |                    |
| Lower gastrointestinal hemorrhage    | Grade 1                             | -       | -                                     | -       | -       | -       | 2       |                    |

| Body System                                          | Adverse Event                       | Grade   | PVSRIPO Dose Escalation |         |         |         |         | Dose Exp (N=52) |
|------------------------------------------------------|-------------------------------------|---------|-------------------------|---------|---------|---------|---------|-----------------|
|                                                      |                                     |         | Dose Level              |         |         |         |         |                 |
|                                                      |                                     |         | 1 (N=1)                 | 2 (N=1) | 3 (N=1) | 4 (N=2) | 5 (N=4) |                 |
|                                                      | Mucositis oral                      | Grade 1 | -                       | -       | -       | -       | -       | 2               |
|                                                      |                                     | Grade 2 | -                       | -       | -       | 1       | -       | 1               |
|                                                      | Nausea                              | Grade 1 | 1                       | -       | -       | 1       | -       | 20              |
|                                                      | Pancreatic hemorrhage               | Grade 2 | -                       | -       | -       | -       | 1       | -               |
|                                                      | Taste disorder                      | Grade 1 | -                       | -       | -       | -       | -       | 1               |
|                                                      | Vomiting                            | Grade 1 | 1                       | -       | 1       | -       | -       | 11              |
| General disorders and administration site conditions | Chills                              | Grade 1 | -                       | -       | -       | -       | -       | 1               |
|                                                      | Edema face                          | Grade 1 | -                       | -       | -       | -       | -       | 1               |
|                                                      | Fatigue                             | Grade 1 | 1                       | -       | -       | 1       | 1       | 13              |
|                                                      |                                     | Grade 2 | -                       | -       | 1       | -       | 1       | 5               |
|                                                      |                                     | Grade 3 | -                       | -       | -       | 1       | -       | -               |
|                                                      | Fever                               | Grade 1 | -                       | -       | -       | -       | 1       | -               |
|                                                      |                                     | Grade 2 | -                       | -       | -       | -       | -       | 1               |
|                                                      | Gait disturbance                    | Grade 1 | -                       | -       | 1       | -       | -       | 5               |
|                                                      |                                     | Grade 3 | -                       | -       | -       | -       | -       | 1               |
|                                                      | Infusion related reaction           | Grade 2 | -                       | -       | -       | -       | -       | 1               |
|                                                      | Irritability                        | Grade 1 | -                       | -       | -       | -       | -       | 3               |
|                                                      |                                     | Grade 2 | -                       | -       | -       | -       | -       | 1               |
|                                                      | Malaise                             | Grade 2 | -                       | -       | -       | -       | -       | 1               |
|                                                      | Non-cardiac chest pain              | Grade 1 | -                       | -       | -       | -       | -       | 1               |
|                                                      | Pain                                | Grade 1 | -                       | 1       | -       | -       | -       | 20              |
|                                                      |                                     | Grade 2 | -                       | -       | -       | -       | -       | 1               |
|                                                      | Steroid myopathy                    | Grade 1 | -                       | -       | -       | 1       | -       | 3               |
| Grade 2                                              |                                     | -       | -                       | 1       | 1       | -       | 1       |                 |
| Grade 3                                              |                                     | -       | -                       | -       | -       | -       | 1       |                 |
| Immune system disorders                              | Allergic reaction                   | Grade 1 | -                       | -       | -       | -       | 2       |                 |
| Infections and infestations                          | Bronchial infection                 | Grade 2 | -                       | -       | -       | -       | -       | 1               |
|                                                      | Conjunctivitis infective            | Grade 2 | -                       | -       | -       | 1       | -       |                 |
|                                                      | Enterocolitis infectious            | Grade 1 | -                       | -       | -       | -       | -       | 1               |
|                                                      |                                     | Grade 3 | -                       | -       | -       | -       | -       | 1               |
|                                                      | Infections and infestations - Other | Grade 1 | -                       | 1       | -       | -       | -       | 1               |
|                                                      |                                     | Grade 2 | -                       | -       | 1       | -       | -       | 1               |
|                                                      | Lung infection                      | Grade 2 | -                       | -       | -       | -       | -       | 1               |
|                                                      |                                     | Grade 3 | -                       | -       | -       | 1       | -       | -               |
|                                                      | Mucosal infection                   | Grade 1 | -                       | -       | -       | -       | -       | 4               |
|                                                      |                                     | Grade 2 | -                       | -       | -       | -       | -       | 1               |
| Phlebitis infective                                  | Grade 2                             | -       | 1                       | -       | -       | -       | -       |                 |
| Skin infection                                       | Grade 1                             | -       | -                       | -       | -       | -       | 3       |                 |

| Body System                                    | Adverse Event                        | Grade    | PVSRIPO Dose Escalation |         |         |         |         | Dose Exp (N=52) |
|------------------------------------------------|--------------------------------------|----------|-------------------------|---------|---------|---------|---------|-----------------|
|                                                |                                      |          | Dose Level              |         |         |         |         |                 |
|                                                |                                      |          | 1 (N=1)                 | 2 (N=1) | 3 (N=1) | 4 (N=2) | 5 (N=4) |                 |
|                                                |                                      | Grade 2  | -                       | -       | -       | 1       | -       | -               |
|                                                | Tooth infection                      | Grade 1  | -                       | -       | -       | -       | -       | 2               |
|                                                | Upper respiratory infection          | Grade 1  | -                       | -       | -       | -       | -       | 9               |
|                                                |                                      | Grade 2  | -                       | -       | -       | 1       | -       | 7               |
|                                                | Urinary tract infection              | Grade 2  | -                       | -       | -       | -       | -       | 5               |
|                                                | Vaginal infection                    | Grade 2  | -                       | -       | -       | -       | -       | 2               |
| Injury, poisoning and procedural complications | Bruising                             | Grade 1  | -                       | -       | -       | 1       | -       | 3               |
|                                                | Burn                                 | Grade 1  | -                       | -       | -       | -       | -       | 1               |
|                                                | Fall                                 | Grade 1  | -                       | -       | -       | 1       | -       | 4               |
|                                                | Vascular access complication         | Grade 2  | -                       | -       | -       | -       | -       | 1               |
| Investigations                                 | Alanine aminotransferase increased   | Grade 1  | -                       | 1       | -       | 1       | -       | 8               |
|                                                |                                      | Grade 2  | -                       | -       | -       | -       | -       | 1               |
|                                                | Alkaline phosphatase increased       | Grade 1  | -                       | -       | -       | 1       | -       | 5               |
|                                                | Aspartate aminotransferase increased | Grade 1  | 1                       | 1       | -       | 2       | -       | 12              |
|                                                |                                      | Grade 3  | -                       | -       | -       | -       | -       | 1               |
|                                                | Blood bilirubin increased            | Grade 1  | -                       | 1       | -       | -       | -       | 4               |
|                                                |                                      | Grade 2  | -                       | -       | -       | 1       | -       | -               |
|                                                | Creatinine increased                 | Grade 1  | -                       | -       | -       | 1       | -       | 9               |
|                                                | Leukopenia                           | Grade 1  | -                       | -       | -       | -       | -       | 5               |
|                                                |                                      | Grade 2  | -                       | -       | -       | -       | 1       | 5               |
|                                                | Lymphopenia                          | Grade 1  | -                       | -       | -       | -       | -       | 4               |
|                                                |                                      | Grade 2  | -                       | -       | -       | -       | 2       | 7               |
|                                                |                                      | Grade 3  | -                       | -       | 1       | 1       | -       | 8               |
|                                                |                                      | Grade 4  | -                       | -       | -       | -       | -       | 1               |
|                                                | Neutropenia                          | Grade 1  | -                       | -       | -       | -       | 1       | 5               |
|                                                |                                      | Grade 2  | -                       | 1       | -       | -       | -       | 2               |
|                                                |                                      | Grade 3  | -                       | -       | -       | -       | -       | 1               |
|                                                | Thrombocytopenia                     | Grade 1  | -                       | -       | 1       | 1       | 1       | 18              |
|                                                |                                      | Grade 2  | -                       | 1       | -       | 1       | -       | -               |
|                                                | Metabolism and nutrition disorders   | Anorexia | Grade 1                 | -       | -       | -       | -       | -               |
| Dehydration                                    |                                      | Grade 1  | -                       | -       | -       | -       | -       | 1               |
|                                                |                                      | Grade 2  | -                       | -       | -       | 1       | -       | 2               |
| Hyperglycemia                                  |                                      | Grade 1  | 1                       | -       | -       | -       | -       | 17              |
|                                                |                                      | Grade 2  | -                       | 1       | 1       | 1       | 1       | 11              |
|                                                |                                      | Grade 3  | -                       | -       | -       | -       | 1       | 4               |
| Hyperkalemia                                   |                                      | Grade 1  | -                       | -       | -       | -       | -       | 1               |
|                                                |                                      | Grade 2  | -                       | -       | -       | -       | -       | 1               |
| Hypernatremia                                  | Grade 1                              | -        | -                       | -       | -       | -       | 2       |                 |

| Body System                                     | Adverse Event               | Grade   | PVSRIPPO Dose Escalation |         |         |         |         | Dose Exp (N=52) |
|-------------------------------------------------|-----------------------------|---------|--------------------------|---------|---------|---------|---------|-----------------|
|                                                 |                             |         | Dose Level               |         |         |         |         |                 |
|                                                 |                             |         | 1 (N=1)                  | 2 (N=1) | 3 (N=1) | 4 (N=2) | 5 (N=4) |                 |
|                                                 | Hypoalbuminemia             | Grade 1 | 1                        | -       | 1       | 1       | 2       | 23              |
|                                                 |                             | Grade 2 | -                        | -       | -       | -       | 1       | 7               |
|                                                 | Hypocalcemia                | Grade 1 | 1                        | -       | 1       | 1       | 1       | 20              |
|                                                 |                             | Grade 2 | -                        | -       | -       | -       | 1       | 3               |
|                                                 |                             | Grade 3 | -                        | -       | -       | -       | -       | 1               |
|                                                 | Hypoglycemia                | Grade 1 | -                        | -       | -       | -       | -       | 10              |
|                                                 | Hypokalemia                 | Grade 1 | -                        | -       | 1       | 1       | 1       | 17              |
|                                                 |                             | Grade 2 | -                        | -       | -       | 1       | -       | -               |
|                                                 | Hypomagnesemia              | Grade 1 | 1                        | -       | -       | 1       | -       | 3               |
|                                                 | Hyponatremia                | Grade 1 | -                        | 1       | -       | -       | 2       | 12              |
| Grade 3                                         |                             | -       | -                        | -       | -       | -       | 1       |                 |
| Hypophosphatemia                                | Grade 1                     | -       | -                        | -       | -       | -       | 1       |                 |
|                                                 | Grade 3                     | -       | -                        | -       | -       | 1       | -       |                 |
| Musculoskeletal and connective tissue disorders | Arthralgia                  | Grade 1 | -                        | -       | -       | -       | -       | 6               |
|                                                 |                             | Grade 2 | -                        | -       | -       | -       | -       | 1               |
|                                                 | Arthritis                   | Grade 1 | -                        | 1       | -       | -       | -       | 3               |
|                                                 | Generalized muscle weakness | Grade 1 | -                        | -       | -       | -       | -       | 1               |
|                                                 |                             | Grade 3 | -                        | -       | -       | 1       | -       | 1               |
| Muscle cramp                                    | Grade 1                     | -       | -                        | -       | -       | -       | 3       |                 |
| Nervous system disorders                        | Cognitive disturbance       | Grade 1 | 1                        | -       | -       | -       | -       | 13              |
|                                                 |                             | Grade 2 | -                        | -       | 1       | -       | -       | 2               |
|                                                 | Dysgeusia                   | Grade 1 | -                        | -       | -       | -       | -       | 1               |
|                                                 | Dysphasia                   | Grade 1 | -                        | -       | -       | -       | 1       | 8               |
|                                                 |                             | Grade 2 | -                        | -       | 1       | -       | 1       | 10              |
|                                                 | Dystonia                    | Grade 3 | -                        | -       | -       | -       | -       | 1               |
|                                                 | Edema cerebral              | Grade 4 | -                        | -       | -       | -       | -       | 1               |
|                                                 | Facial muscle weakness      | Grade 1 | -                        | -       | -       | -       | -       | 1               |
|                                                 | Headache                    | Grade 1 | 1                        | -       | -       | 2       | 1       | 21              |
|                                                 |                             | Grade 2 | -                        | -       | -       | -       | -       | 15              |
|                                                 |                             | Grade 3 | -                        | -       | -       | -       | -       | 1               |
|                                                 | Hydrocephalus               | Grade 2 | -                        | -       | -       | -       | -       | 1               |
|                                                 | Intracranial hemorrhage     | Grade 1 | -                        | -       | -       | -       | -       | 1               |
|                                                 |                             | Grade 2 | -                        | -       | -       | -       | -       | 1               |
|                                                 |                             | Grade 4 | -                        | -       | -       | -       | 1       | -               |
|                                                 |                             | Grade 5 | -                        | -       | -       | -       | -       | 3               |
|                                                 | Myokymia                    | Grade 1 | -                        | -       | -       | -       | -       | 1               |
| Nervous system disorders - Other                | Grade 1                     | -       | -                        | -       | -       | -       | 2       |                 |
| Paresthesia                                     | Grade 1                     | -       | 1                        | -       | -       | -       | 10      |                 |
|                                                 | Grade 2                     | -       | -                        | -       | 1       | 1       | 1       |                 |
| Peripheral sensory neuropathy                   | Grade 1                     | -       | -                        | -       | -       | -       | 2       |                 |

| Body System                                     | Adverse Event                          | Grade   | PVSRIPO Dose Escalation |         |         |         |         | Dose Exp (N=52) |
|-------------------------------------------------|----------------------------------------|---------|-------------------------|---------|---------|---------|---------|-----------------|
|                                                 |                                        |         | Dose Level              |         |         |         |         |                 |
|                                                 |                                        |         | 1 (N=1)                 | 2 (N=1) | 3 (N=1) | 4 (N=2) | 5 (N=4) |                 |
|                                                 | Presyncope                             | Grade 2 | -                       | 1       | -       | -       | -       | -               |
|                                                 | Pyramidal tract syndrome (hemiparesis) | Grade 1 | -                       | -       | -       | -       | -       | 13              |
|                                                 |                                        | Grade 2 | -                       | -       | -       | -       | 1       | 11              |
|                                                 |                                        | Grade 3 | -                       | -       | -       | 1       | 2       | 4               |
|                                                 | Restless leg syndrome                  | Grade 1 | -                       | -       | -       | -       | -       | 1               |
|                                                 | Seizure                                | Grade 1 | -                       | 1       | -       | -       | 4       | 24              |
|                                                 |                                        | Grade 2 | -                       | -       | 1       | -       | -       | 4               |
|                                                 |                                        | Grade 3 | 1                       | -       | -       | -       | -       | 2               |
|                                                 |                                        | Grade 5 | -                       | -       | -       | -       | -       | 1               |
|                                                 | Tremor                                 | Grade 1 | -                       | -       | -       | -       | -       | 2               |
| Psychiatric disorders                           | Agitation                              | Grade 1 | -                       | -       | -       | -       | -       | 1               |
|                                                 | Anxiety                                | Grade 1 | -                       | -       | -       | -       | -       | 5               |
|                                                 |                                        | Grade 3 | -                       | -       | -       | -       | -       | 1               |
|                                                 | Confusion                              | Grade 1 | -                       | -       | -       | -       | 1       | 5               |
|                                                 |                                        | Grade 2 | -                       | -       | -       | -       | -       | 6               |
|                                                 |                                        | Grade 3 | -                       | -       | -       | -       | -       | 1               |
|                                                 | Delusions                              | Grade 3 | -                       | -       | -       | -       | -       | 1               |
|                                                 | Depression                             | Grade 1 | -                       | -       | -       | -       | -       | 3               |
|                                                 |                                        | Grade 2 | -                       | -       | -       | -       | -       | 2               |
|                                                 | Hallucinations                         | Grade 1 | -                       | -       | -       | -       | -       | 2               |
| Insomnia                                        | Grade 1                                | -       | -                       | -       | -       | 1       | 13      |                 |
|                                                 | Grade 2                                | -       | -                       | -       | -       | -       | 1       |                 |
| Suicidal ideation                               | Grade 2                                | -       | -                       | -       | -       | -       | 2       |                 |
| Renal and urinary disorders                     | Hematuria                              | Grade 1 | -                       | -       | -       | -       | -       | 4               |
|                                                 | Proteinuria                            | Grade 1 | -                       | -       | -       | 1       | -       | 5               |
|                                                 |                                        | Grade 3 | -                       | -       | -       | -       | -       | 1               |
|                                                 | Renal and urinary disorders - Other    | Grade 1 | -                       | -       | -       | -       | -       | 1               |
|                                                 | Renal calculi                          | Grade 2 | -                       | -       | -       | -       | -       | 1               |
|                                                 | Urinary frequency                      | Grade 1 | -                       | -       | 1       | -       | -       | 2               |
|                                                 | Urinary incontinence                   | Grade 1 | -                       | -       | 1       | -       | -       | 5               |
| Grade 2                                         |                                        | -       | -                       | -       | -       | -       | 1       |                 |
| Urinary retention                               | Grade 1                                | -       | -                       | -       | -       | -       | 1       |                 |
| Reproductive system and breast disorders        | Irregular menstruation                 | Grade 1 | -                       | -       | -       | -       | -       | 2               |
|                                                 | Vaginal hemorrhage                     | Grade 1 | -                       | -       | -       | -       | -       | 1               |
| Respiratory, thoracic and mediastinal disorders | Allergic rhinitis                      | Grade 2 | -                       | -       | -       | -       | -       | 4               |
|                                                 | Cough                                  | Grade 1 | -                       | -       | 1       | 1       | -       | -               |
|                                                 |                                        | Grade 2 | -                       | -       | -       | -       | -       | 1               |
|                                                 | Dry nose                               | Grade 1 | -                       | -       | -       | -       | -       | 1               |
|                                                 | Dyspnea                                | Grade 1 | -                       | -       | 1       | -       | -       | 6               |
| Epistaxis                                       | Grade 1                                | -       | -                       | -       | -       | -       | 4       |                 |

| Body System                            | Adverse Event                                           | Grade   | PVSRIPO Dose Escalation<br>Dose Level |         |         |         |         | Dose Exp<br>(N=52) |
|----------------------------------------|---------------------------------------------------------|---------|---------------------------------------|---------|---------|---------|---------|--------------------|
|                                        |                                                         |         | 1 (N=1)                               | 2 (N=1) | 3 (N=1) | 4 (N=2) | 5 (N=4) |                    |
|                                        | Hiccups                                                 | Grade 1 | -                                     | -       | -       | -       | -       | 1                  |
|                                        | Hoarseness                                              | Grade 1 | -                                     | -       | -       | -       | 1       | 3                  |
|                                        | Nasal congestion                                        | Grade 1 | 1                                     | -       | 1       | 1       | -       | 4                  |
|                                        | Postnasal drip                                          | Grade 1 | -                                     | -       | -       | -       | -       | 5                  |
|                                        | Pulmonary Nodule                                        | Grade 1 | -                                     | -       | 1       | -       | -       | -                  |
|                                        | Respiratory, thoracic and mediastinal disorders - Other | Grade 1 | -                                     | -       | -       | -       | -       | 1                  |
|                                        | Sleep apnea                                             | Grade 2 | -                                     | -       | -       | -       | -       | 2                  |
| Skin and subcutaneous tissue disorders | Dry skin                                                | Grade 1 | -                                     | -       | -       | -       | -       | 7                  |
|                                        | Pruritus                                                | Grade 1 | -                                     | -       | -       | -       | -       | 1                  |
|                                        | Rash                                                    | Grade 1 | -                                     | -       | -       | -       | 1       | 9                  |
|                                        |                                                         | Grade 2 | -                                     | -       | -       | -       | -       | 1                  |
|                                        | Skin and subcutaneous tissue disorders - Other          | Grade 1 | -                                     | -       | -       | -       | -       | 1                  |
|                                        | Skin trauma                                             | Grade 1 | -                                     | -       | -       | -       | -       | 4                  |
| Grade 2                                |                                                         | -       | -                                     | -       | -       | -       | 2       |                    |
| Social circumstances                   | Menopause                                               | Grade 1 | -                                     | -       | -       | -       | -       | 1                  |
| Surgical and medical procedures        | Incisional hernia repair                                | Grade 3 | -                                     | 1       | -       | -       | -       | -                  |
| Vascular disorders                     | Hot flashes                                             | Grade 1 | -                                     | -       | -       | -       | -       | 2                  |
|                                        | Hypertension                                            | Grade 1 | -                                     | -       | -       | -       | -       | 2                  |
|                                        |                                                         | Grade 2 | -                                     | -       | -       | -       | 1       | 8                  |
|                                        |                                                         | Grade 3 | -                                     | -       | -       | -       | -       | 2                  |
|                                        | Thromboembolic event                                    | Grade 2 | -                                     | -       | 1       | -       | 1       | 2                  |
| Grade 3                                |                                                         | -       | 1                                     | -       | -       | -       | 3       |                    |
| <b>Total Patients with an Event</b>    |                                                         |         | 1                                     | 1       | 1       | 2       | 4       | 52                 |

\*Only includes the highest-grade event for each type of adverse event experienced by a patient.



**Table S4. PVSRIPO patient prognostic, treatment and survival information\*.**

| Pat. | Age at tx | PVSRIPO Dose Level | Prior Recurr. (#) | Prior BEV failure | KPS at tx | BEV post-PVSRIPO (mg/kg) | Chemo +/- BEV post-PVSRIPO | OS (months) | IDH1 Status at dx | MGMT Status at dx | MGMT Status at tx |
|------|-----------|--------------------|-------------------|-------------------|-----------|--------------------------|----------------------------|-------------|-------------------|-------------------|-------------------|
| 1    | 20        | 1                  | 1                 | Yes               | 90        | None                     | None                       | 70.4+       | Mutated           | Unknown           | Unmethylated      |
| 2    | 69        | 2                  | 1                 | Naïve             | 90        | None                     | None                       | 69.2+       | Wildtype          | Unknown           | Methylated        |
| 3    | 62        | 3                  | 1                 | Yes               | 90        | 10.0                     | None                       | 5.8         | Wildtype          | Unknown           | Unmethylated      |
| 4    | 70        | 4                  | 1                 | Yes               | 70        | None                     | None                       | 5.6         | Wildtype          | Unknown           | Unmethylated      |
| 5    | 60        | 5                  | 3                 | Naïve             | 80        | None                     | None                       | 19.8        | Wildtype          | Unmethylated      | Methylated        |
| 6    | 61        | 5                  | 1                 | Naïve             | 80        | 10.0                     | Lomustine/BEV, VP-16/BEV   | 12.5        | Wildtype          | Unknown           | Unmethylated      |
| 7    | 55        | 5                  | 1                 | Naïve             | 90        | 10.0                     | Lomustine                  | 15.2        | Wildtype          | Unknown           | Unmethylated      |
| 8    | 40        | 5                  | 1                 | No                | 90        | None                     | Lomustine                  | 57.5+       | Wildtype          | Unknown           | Methylated        |
| 9    | 58        | 4                  | 1                 | Yes               | 90        | 5.0                      | TMZ/BEV, CPT-11/BEV        | 16.5        | Wildtype          | Unknown           | Unmethylated      |
| 10   | 68        | 2                  | 1                 | Naïve             | 90        | 10.0                     | None                       | 7.0         | Wildtype          | Unknown           | Methylated        |
| 11   | 50        | 2                  | 2                 | Yes               | 80        | 7.5                      | TMZ/BEV                    | 9.3         | Wildtype          | Unknown           | Unmethylated      |
| 12   | 38        | 2                  | 2                 | Naïve             | 90        | 10.0                     | None                       | 6.3         | Wildtype          | Unknown           | Unmethylated      |
| 13   | 37        | 2                  | 1                 | Yes               | 90        | 10.0                     | TMZ/BEV, Lomustine/BEV     | 12.6        | Wildtype          | Unknown           | Unmethylated      |
| 14   | 60        | 2                  | 1                 | Naïve             | 80        | 7.5-10.0                 | None                       | 8.6         | Wildtype          | Unknown           | Unmethylated      |
| 15   | 56        | 2                  | 1                 | Naïve             | 100       | 7.5                      | CPT-11/BEV, Lomustine/BEV  | 15.9        | Wildtype          | Unknown           | Unmethylated      |
| 16   | 57        | -1                 | 1                 | Naïve             | 80        | None                     | None                       | 41.1+       | Wildtype          | Methylated        | Methylated        |

| Pat. | Age at tx | PVSRIPO Dose Level | Prior Recurr. (#) | Prior BEV failure | KPS at tx | BEV post-PVSRIPO (mg/kg) | Chemo +/- BEV post-PVSRIPO              | OS (months) | IDH1 Status at dx | MGMT Status at dx | MGMT Status at tx |
|------|-----------|--------------------|-------------------|-------------------|-----------|--------------------------|-----------------------------------------|-------------|-------------------|-------------------|-------------------|
| 17   | 58        | -1                 | 1                 | Naïve             | 90        | 7.5                      | TMZ/BEV                                 | 17.3        | Unknown           | Methylated        | Methylated        |
| 18   | 69        | -1                 | 1                 | Naïve             | 80        | 10.0                     | None                                    | 3.1         | Unknown           | Methylated        | Unmethylated      |
| 19   | 69        | -1                 | 2                 | Yes               | 80        | 7.5                      | None                                    | 6.5         | Wildtype          | Unmethylated      | Unmethylated      |
| 20   | 28        | -1                 | 1                 | Yes               | 90        | 7.5                      | TMZ                                     | 15.0        | Wildtype          | Unmethylated      | Methylated        |
| 21   | 59        | -1                 | 3                 | Yes               | 90        | 7.5                      | Lomustine/BEV                           | 8.3         | Wildtype          | Methylated        | Methylated        |
| 22   | 35        | -1                 | 1                 | Naïve             | 90        | None                     | TMZ                                     | 36.1+       | Wildtype          | Methylated        | Unmethylated      |
| 23   | 39        | -1                 | 1                 | Naïve             | 90        | 7.5                      | Lomustine/Optune/BEV /Valcyte, Nivo/BEV | 17.8        | Wildtype          | Unmethylated      | Methylated        |
| 24   | 54        | -1                 | 1                 | Naïve             | 90        | 7.5                      | Lomustine, CPT-11/BEV, Carboplatin/BEV  | 14.3        | Wildtype          | Methylated        | Unmethylated      |
| 25   | 59        | -1                 | 1                 | Naïve             | 100       | 7.5                      | None                                    | 34.1+       | Wildtype          | Unmethylated      | Unmethylated      |
| 26   | 24        | -1                 | 4                 | Yes               | 90        | None                     | CPT-11/BEV, Carboplatin                 | 6.7         | Mutated           | Unmethylated      | Unknown           |
| 27   | 60        | -1                 | 1                 | Naïve             | 90        | 7.5                      | TMZ/BEV                                 | 9.4         | Wildtype          | Methylated        | Methylated        |
| 28   | 53        | -1                 | 2                 | Naïve             | 90        | 7.5                      | TMZ/BEV, Lomustine/BEV                  | 12.3        | Wildtype          | Unmethylated      | Unmethylated      |
| 29   | 55        | -1                 | 2                 | Yes               | 80        | 7.5                      | TMZ/BEV                                 | 5.6         | Wildtype          | Unmethylated      | Unmethylated      |
| 30   | 55        | -1                 | 1                 | Naïve             | 80        | 7.5                      | TMZ/BEV, Lomustine/BEV                  | 9.6         | Wildtype          | Unmethylated      | Unmethylated      |
| 31   | 54        | -1                 | 2                 | Naïve             | 90        | 7.5                      | None                                    | 10.4        | Wildtype          | Unmethylated      | Unmethylated      |
| 32   | 48        | -1                 | 1                 | Naïve             | 90        | 7.5                      | Lomustine/BEV                           | 9.8         | Wildtype          | Unmethylated      | Unmethylated      |
| 33   | 64        | -1                 | 1                 | Naïve             | 90        | 7.5                      | Lomustine/BEV                           | 27.6+       | Wildtype          | Methylated        | Unknown           |
| 34   | 73        | -1                 | 1                 | Naïve             | 90        | 7.5                      | None                                    | 27.1+       | Wildtype          | Methylated        | Methylated        |

| Pat. | Age at tx | PVSRIPO Dose Level | Prior Recurr. (#) | Prior BEV failure | KPS at tx | BEV post-PVSRIPO (mg/kg) | Chemo +/- BEV post-PVSRIPO            | OS (months) | IDH1 Status at dx | MGMT Status at dx | MGMT Status at tx |
|------|-----------|--------------------|-------------------|-------------------|-----------|--------------------------|---------------------------------------|-------------|-------------------|-------------------|-------------------|
| 35   | 51        | -1                 | 1                 | Naïve             | 90        | 7.5                      | CPT-11/BEV                            | 15.3        | Wildtype          | Unmethylated      | Unmethylated      |
| 36   | 52        | -1                 | 1                 | Naïve             | 90        | None                     | Lomustine/BEV                         | 6.7         | Unknown           | Unmethylated      | Unmethylated      |
| 37   | 40        | -1                 | 1                 | Naïve             | 80        | 7.5                      | Lomustine/BEV, CPT-11/BEV             | 13.1        | Wildtype          | Unmethylated      | Unmethylated      |
| 38   | 58        | -1                 | 2                 | Naïve             | 90        | 7.5                      | None                                  | 10.7        | Unknown           | Unknown           | Methylated        |
| 39   | 54        | -1                 | 1                 | Naïve             | 90        | 7.5                      | Lomustine/BEV, TMZ/BEV                | 9.0         | Wildtype          | Unmethylated      | Unmethylated      |
| 40   | 52        | -2                 | 1                 | Naïve             | 90        | 7.5                      | Lomustine/BEV Carboplatin/BEV         | 20.5+       | Wildtype          | Unmethylated      | Unknown           |
| 41   | 54        | -2                 | 1                 | Naïve             | 90        | 7.5                      | None                                  | 17.1        | Wildtype          | Methylated        | Unmethylated      |
| 42   | 55        | -2                 | 1                 | Naïve             | 80        | 7.5                      | Lomustine/BEV, CPT-11/BEV             | 10.0        | Wildtype          | Unmethylated      | Unmethylated      |
| 43   | 40        | -2                 | 2                 | Naïve             | 90        | None                     | None                                  | 4.8         | Unknown           | Unknown           | Unmethylated      |
| 44   | 51        | -2                 | 1                 | Naïve             | 90        | 7.5                      | TMZ                                   | 8.0         | Wildtype          | Unmethylated      | Unmethylated      |
| 45   | 73        | -2                 | 1                 | Naïve             | 90        | 7.5-10.0                 | None                                  | 8.9         | Wildtype          | Methylated        | Methylated        |
| 46   | 32        | -2                 | 2                 | Naïve             | 90        | None                     | CPT-11/BEV                            | 13.2        | Mutated           | Unmethylated      | Unmethylated      |
| 47   | 51        | -2                 | 1                 | Naïve             | 80        | 5.0-10.0                 | None                                  | 7.2         | Unknown           | Unknown           | Unmethylated      |
| 48   | 54        | -2                 | 1                 | Naïve             | 90        | 7.5                      | Lomustine/BEV, CPT-11/Carboplatin/BEV | 12.5        | Wildtype          | Unmethylated      | Unmethylated      |
| 49   | 75        | -2                 | 1                 | Naïve             | 80        | 7.5                      | None                                  | 15.4+       | Wildtype          | Methylated        | Unknown           |
| 50   | 47        | -2                 | 1                 | Naïve             | 90        | None                     | None                                  | 15.1+       | Mutated           | Methylated        | Methylated        |
| 51   | 43        | -2                 | 2                 | Yes               | 90        | 7.5                      | Lomustine/BEV                         | 13.9+       | Mutated           | Unmethylated      | Unknown           |
| 52   | 63        | -2                 | 1                 | Naïve             | 80        | None                     | Marizomib, BEV                        | 4.9         | Wildtype          | Unmethylated      | Unmethylated      |

| Pat. | Age at tx | PVSRIPO Dose Level | Prior Recurr. (#) | Prior BEV failure | KPS at tx | BEV post-PVSRIPO (mg/kg) | Chemo +/- BEV post-PVSRIPO | OS (months) | IDH1 Status at dx | MGMT Status at dx | MGMT Status at tx |
|------|-----------|--------------------|-------------------|-------------------|-----------|--------------------------|----------------------------|-------------|-------------------|-------------------|-------------------|
| 53   | 45        | -2                 | 2                 | Naïve             | 90        | None                     | None                       | 13.5+       | Mutated           | Methylated        | Unknown           |
| 54   | 56        | -2                 | 1                 | Naïve             | 90        | 7.5-10.0                 | Lomustine/BEV              | 11.0        | Unknown           | Unknown           | Unknown           |
| 55   | 61        | -1                 | 2                 | Yes               | 90        | 7.5                      | None                       | 7.9         | Wildtype          | Methylated        | Unknown           |
| 56   | 29        | -1                 | 1                 | Naïve             | 90        | 7.5                      | Lomustine/BEV              | 11.9+       | Unknown           | Unknown           | Unknown           |
| 57   | 39        | -1                 | 1                 | Naïve             | 90        | 7.5                      | Lomustine/BEV              | 10.2        | Mutated           | Unmethylated      | Unmethylated      |
| 58   | 60        | -1                 | 4                 | Yes               | 90        | 7.5                      | None                       | 11.4+       | Wildtype          | Methylated        | Unknown           |
| 59   | 56        | -1                 | 1                 | Naïve             | 90        | 7.5                      | Lomustine/BEV              | 9.9         | Wildtype          | Methylated        | Unknown           |
| 60   | 63        | -1                 | 1                 | Naïve             | 80        | 7.5                      | Lomustine/BEV, CPT-11/BEV  | 10.5+       | Wildtype          | Unmethylated      | Unmethylated      |
| 61   | 57        | -1                 | 1                 | Naïve             | 80        | 7.5                      | CPT-11/BEV                 | 9.8+        | Unknown           | Unknown           | Unmethylated      |

\*'Bev post-PVSRIPO' represents treatment with bevacizumab alone after administration of PVSRIPO and prior to any other treatments. 'Chemo +/- BEV post-PVSRIPO' represents treatment with chemotherapy alone or in combination with bevacizumab after going off the PVSRIPO study. For OS, '+' indicates the patient was alive as of 03/20/18.

| Patient nr. | CD155 cytopl./membr. at dx |     |    |   |
|-------------|----------------------------|-----|----|---|
|             | 3+                         | 2+  | 1+ | - |
| 1           | 80                         | 20  |    |   |
| 2           |                            | 90  | 10 |   |
| 3           | 10                         | 90  |    |   |
| 4           |                            |     |    |   |
| 5           |                            |     |    |   |
| 6           |                            | 90  | 10 |   |
| 7           |                            | 30  | 20 |   |
| 8           |                            | 90  |    |   |
| 9           |                            |     |    |   |
| 10          |                            | 100 |    |   |
| 11          | 70                         | 30  |    |   |
| 12          |                            |     |    |   |
| 13          |                            |     |    |   |
| 14          |                            |     |    |   |
| 15          |                            |     |    |   |
| 16          |                            |     |    |   |
| 17          |                            | 75  | 25 |   |
| 18          |                            | 100 |    |   |
| 19          |                            |     |    |   |
| 20          |                            | 20  | 80 |   |
| 21          |                            | 80  |    |   |
| 22          | 10                         | 70  | 10 |   |
| 23          |                            | 80  | 20 |   |
| 24          |                            | 30  | 70 |   |
| 25          |                            | 80  | 10 |   |
| 26          |                            |     |    |   |
| 27          | 100                        |     |    |   |
| 28          |                            |     |    |   |
| 29          |                            | 20  | 80 |   |
| 30          |                            | 100 |    |   |
| 31          |                            |     |    |   |

| Patient nr. | CD155 cytopl./membr. at dx |     |    |    |
|-------------|----------------------------|-----|----|----|
|             | 3+                         | 2+  | 1+ | -  |
| 32          |                            | 70  | 30 |    |
| 33          |                            | 100 |    |    |
| 34          |                            | 90  | 10 |    |
| 35          |                            | 70  | 30 |    |
| 36          |                            | 80  | 20 |    |
| 37          |                            | 80  | 20 |    |
| 38          |                            |     |    |    |
| 39          | 90                         | 10  |    |    |
| 40          |                            | 100 |    |    |
| 41          |                            | 60  |    |    |
| 42          |                            | 100 |    |    |
| 43          |                            |     |    |    |
| 44          |                            | 80  |    |    |
| 45          | 20                         | 80  |    |    |
| 46          |                            | 60  | 30 | 10 |
| 47          |                            |     |    |    |
| 48          |                            | 100 |    |    |
| 49          |                            | 100 |    |    |
| 50          | 100                        |     |    |    |
| 51          |                            | 80  |    |    |
| 52          |                            | 70  |    |    |
| 53          |                            | 80  |    |    |
| 54          |                            |     |    |    |
| 55          |                            | 90  |    |    |
| 56          |                            |     |    |    |
| 57          |                            | 80  |    |    |
| 58          | 80                         |     |    |    |
| 59          | 90                         |     |    |    |
| 60          |                            | 90  |    |    |
| 61          |                            |     |    |    |

**Figure S1. CD155 immunohistochemistry in tumor tissues resected prior to enrollment of 43 out of 61 patients in the PVSRIPO clinical trial.** Validation of the assay and the reagents used, and scoring for CD155 expression levels have been described previously<sup>9</sup>. Blue shading indicates that tissue was not available for analysis.

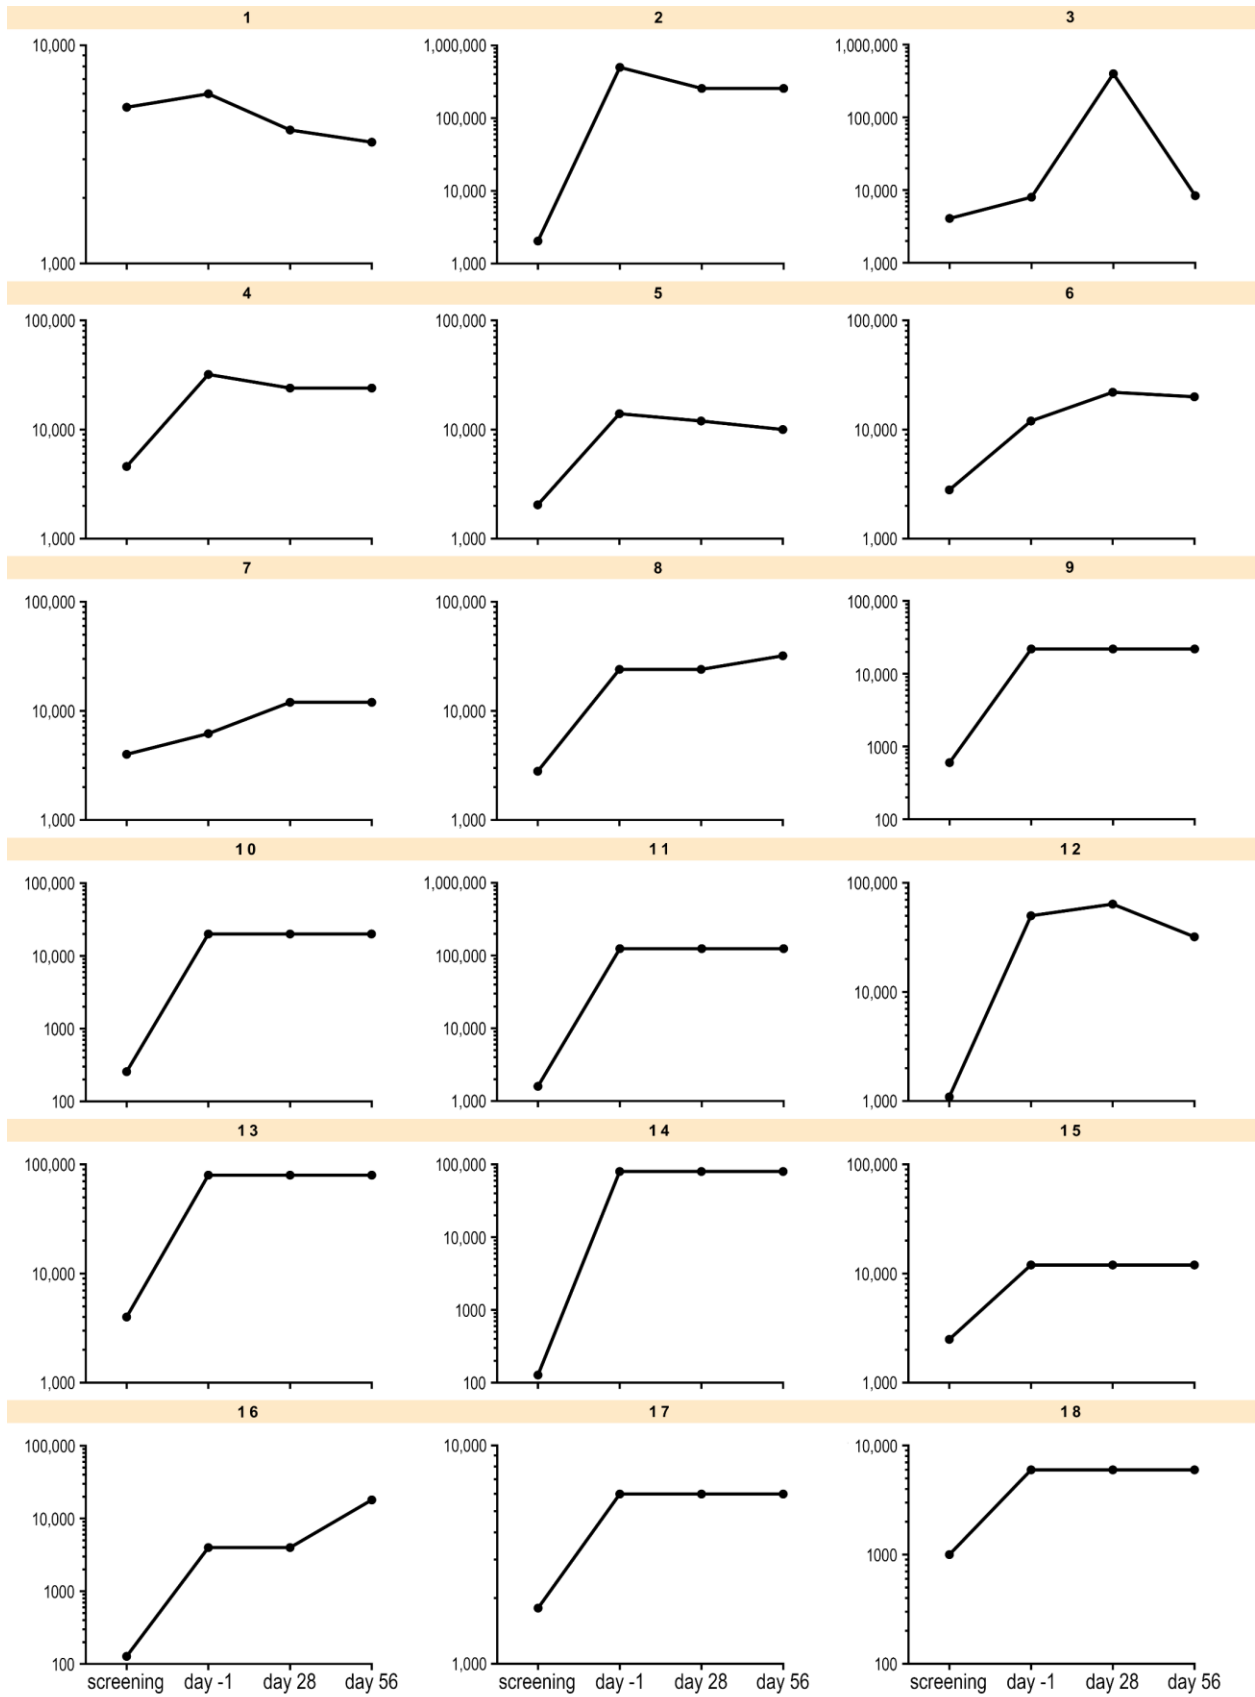

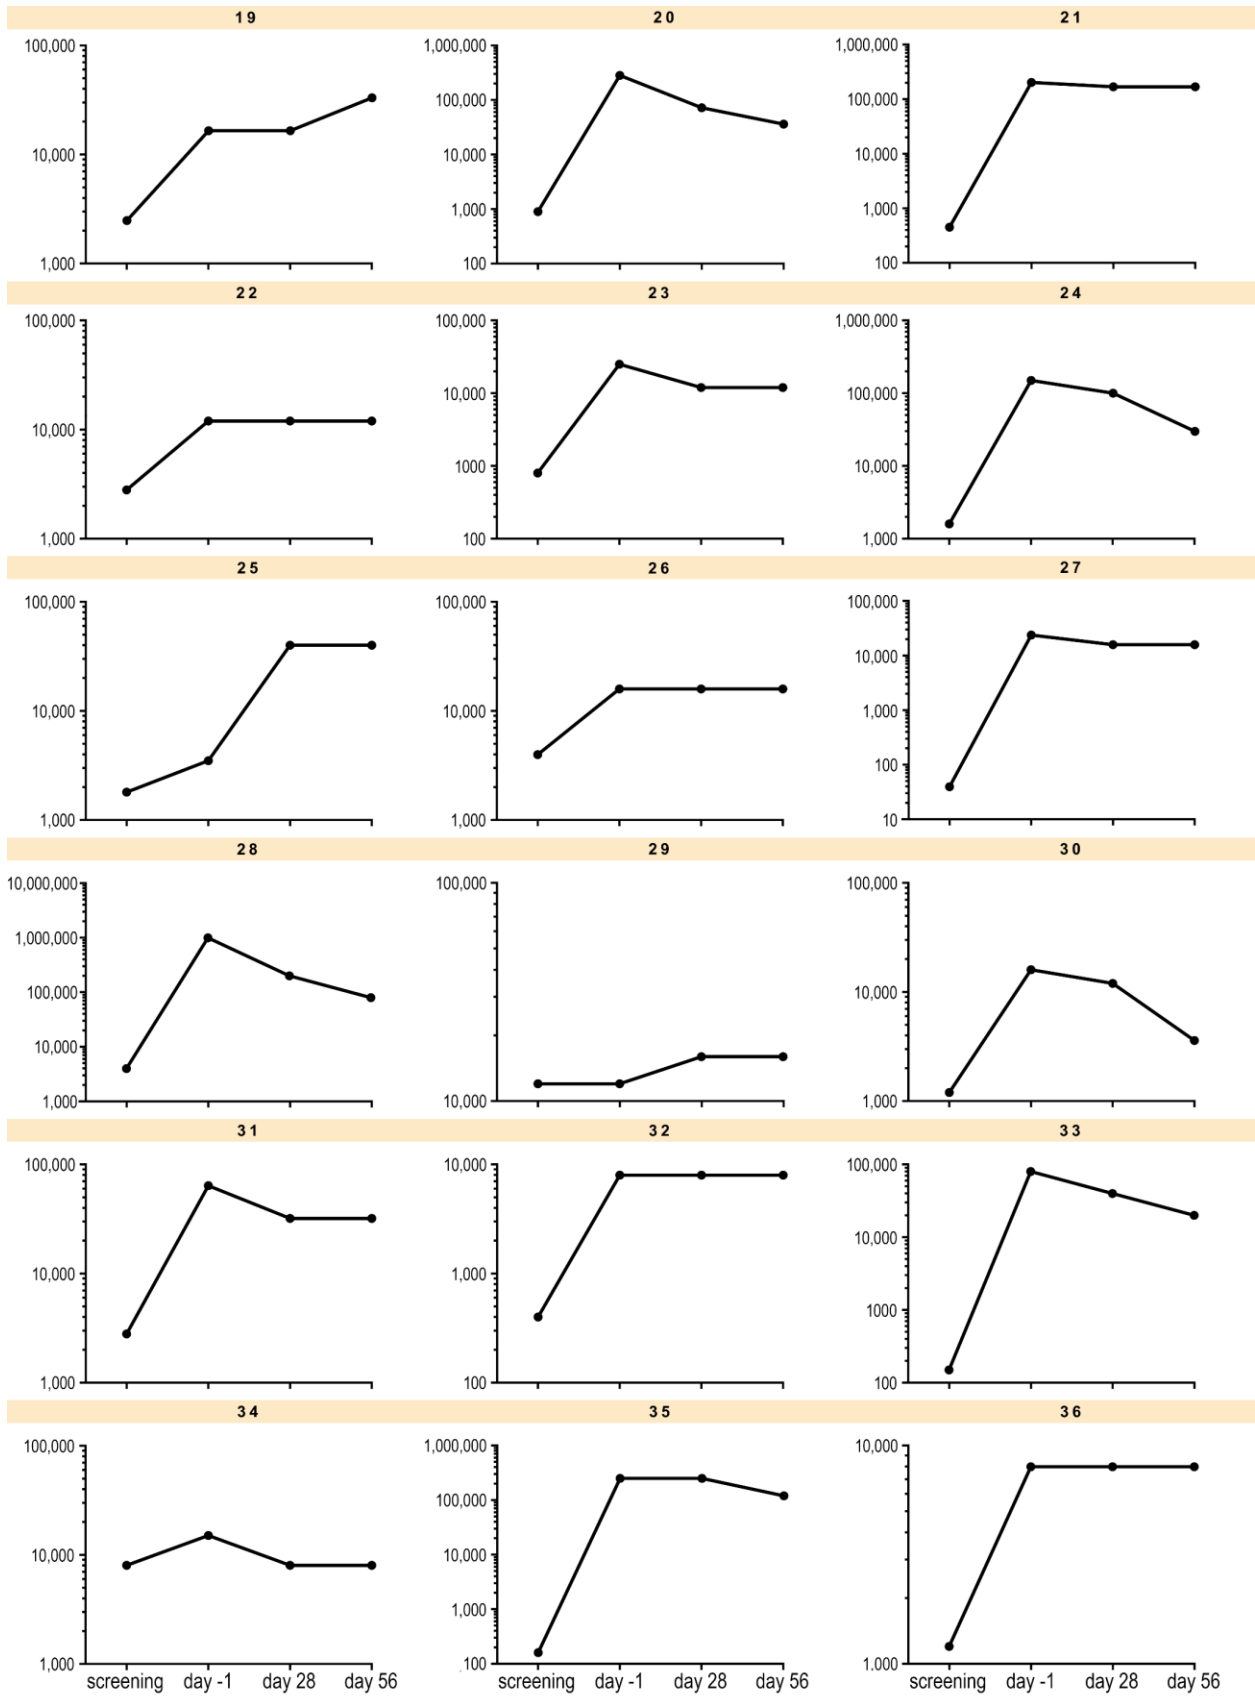

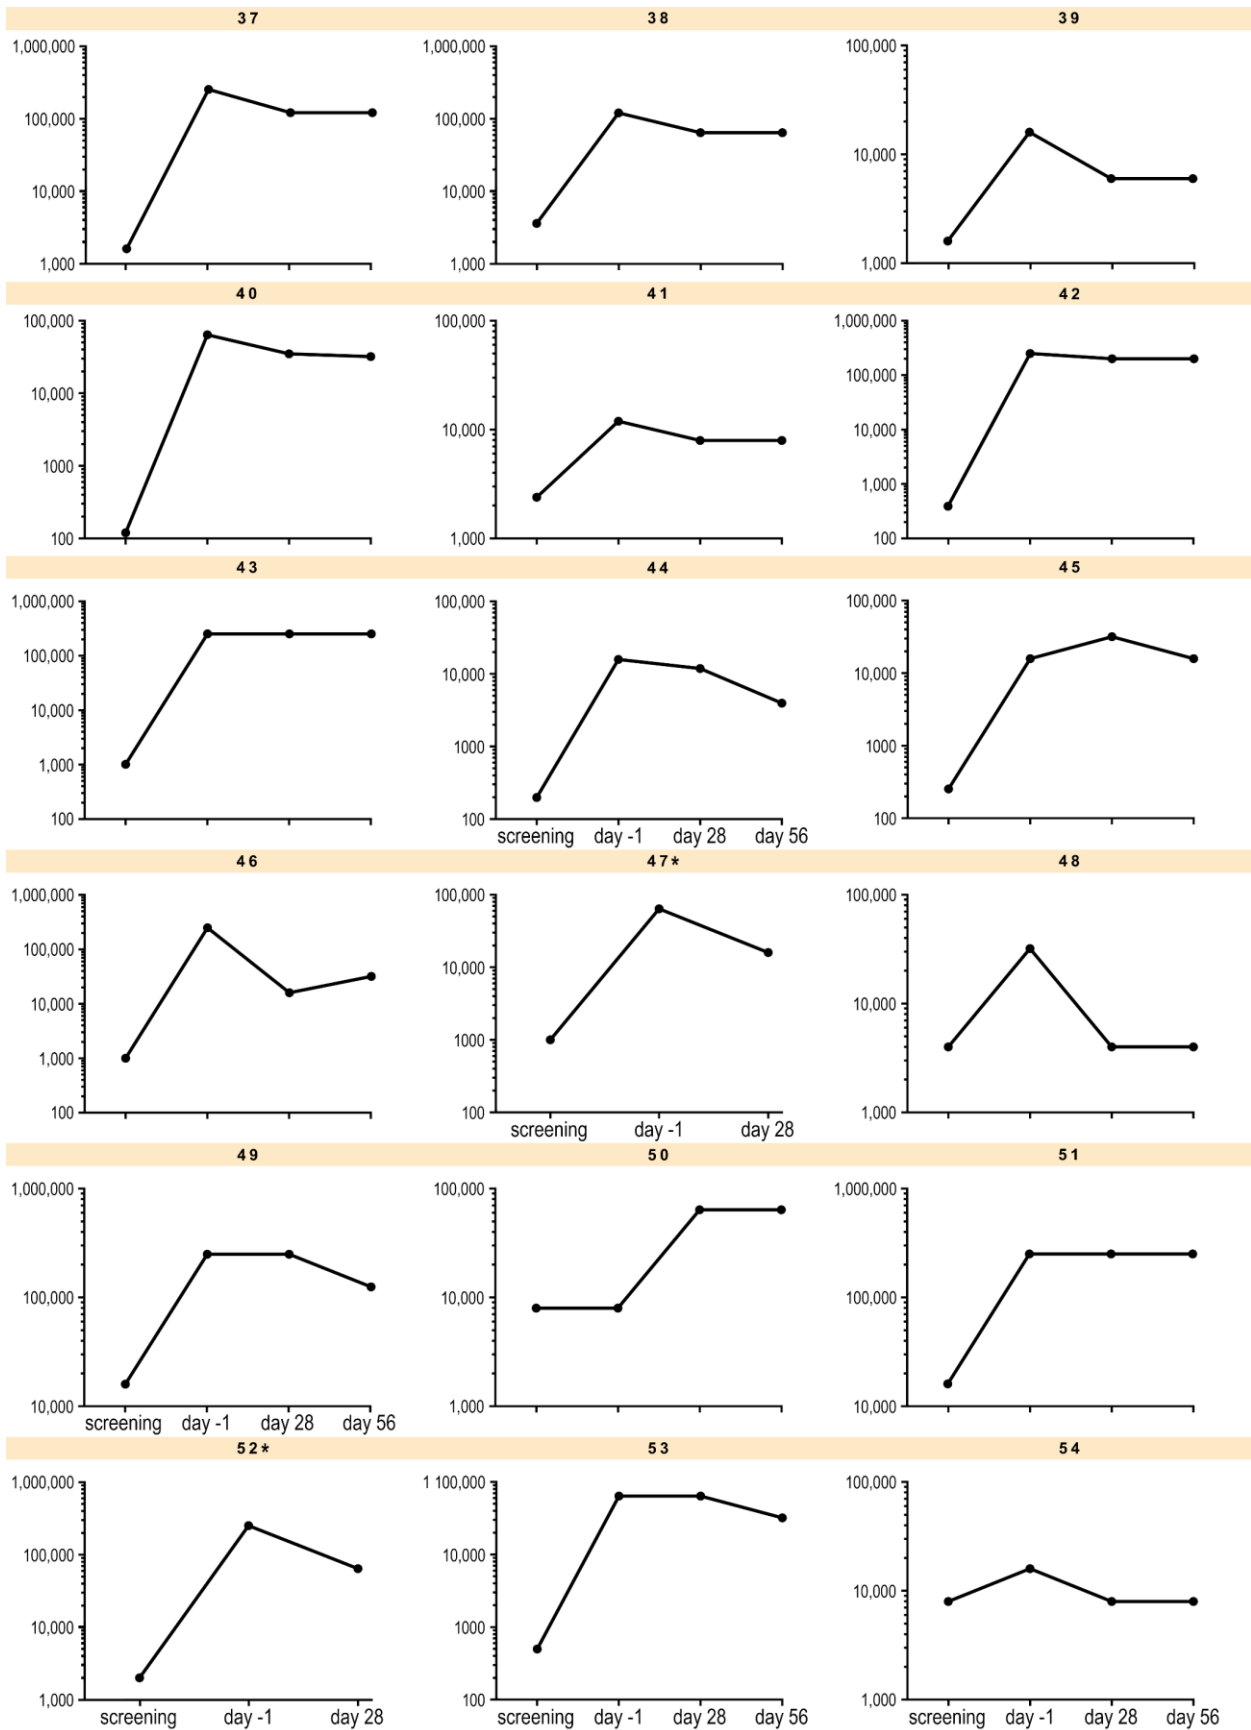



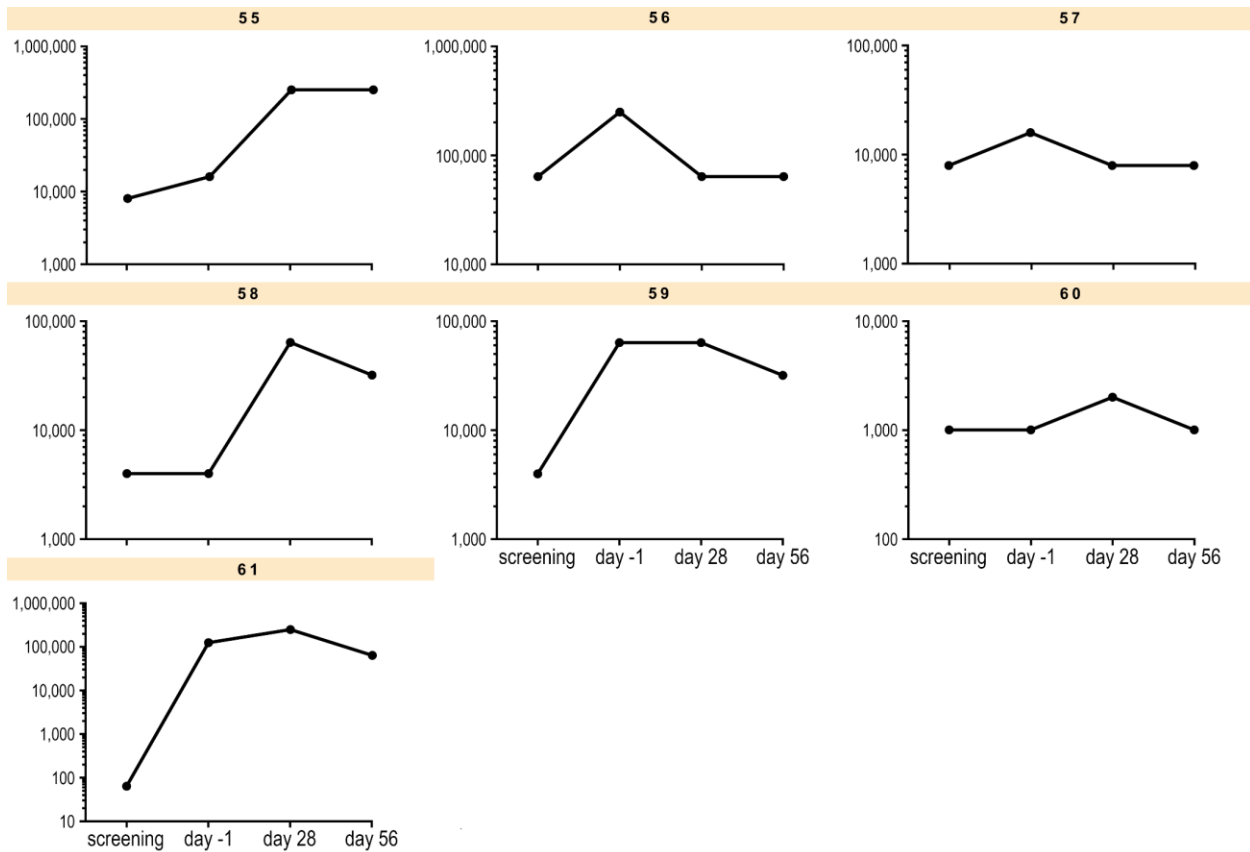

**Figure S2. Serum anti-poliovirus (type 1) neutralizing antibody titers.** Anti-poliovirus (type 1) neutralizing antibody titers in patients treated with PVSRIPO at the screening stage (pre-boost immunization, pre-PVSRIPO), day -1 (post-boost immunization, pre-PVSRIPO), and days 28/56 (post-boost immunization, post-PVSRIPO). Asterisks indicate two patients where a day 56 sample was not available for testing. The range of titers in all patient samples at the screening stage was 40-64,000; and 1,000-1,000,000 (day -1); 1,600-400,000 (day 28); 1,600-256,000 (day 56) thereafter.

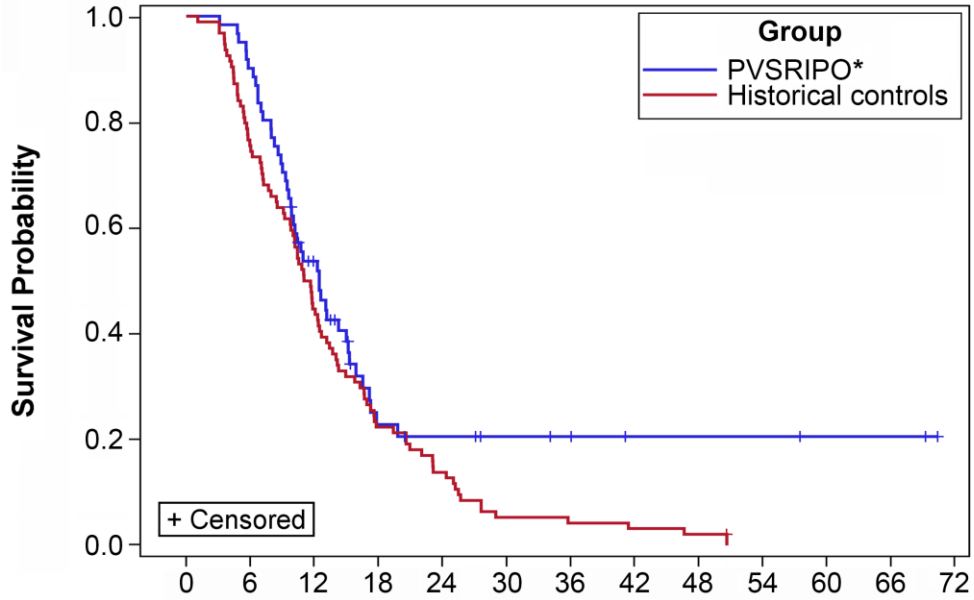

**Time from start of study treatment to death or last follow-up (months)**

|                     |    |    |    |    |    |   |   |   |   |   |   |   |
|---------------------|----|----|----|----|----|---|---|---|---|---|---|---|
| PVSRIPO             | 61 | 55 | 29 | 10 | 8  | 6 | 5 | 3 | 3 | 3 | 2 | 2 |
| Historical controls | 94 | 71 | 42 | 21 | 13 | 5 | 4 | 3 | 2 |   |   |   |

\*Note: No PVSRIPO patients have been lost to follow-up

**Figure S3. Survival of PVSRIPO patients and the historical control cohort excluding biopsy-only patients.** Overall survival sensitivity analysis in which the historical control cohort (n=104) was reduced to 94, by removing 10 patients who had received only a biopsy at the time of diagnosis (see **Table 1**; compare **Figure 1**).

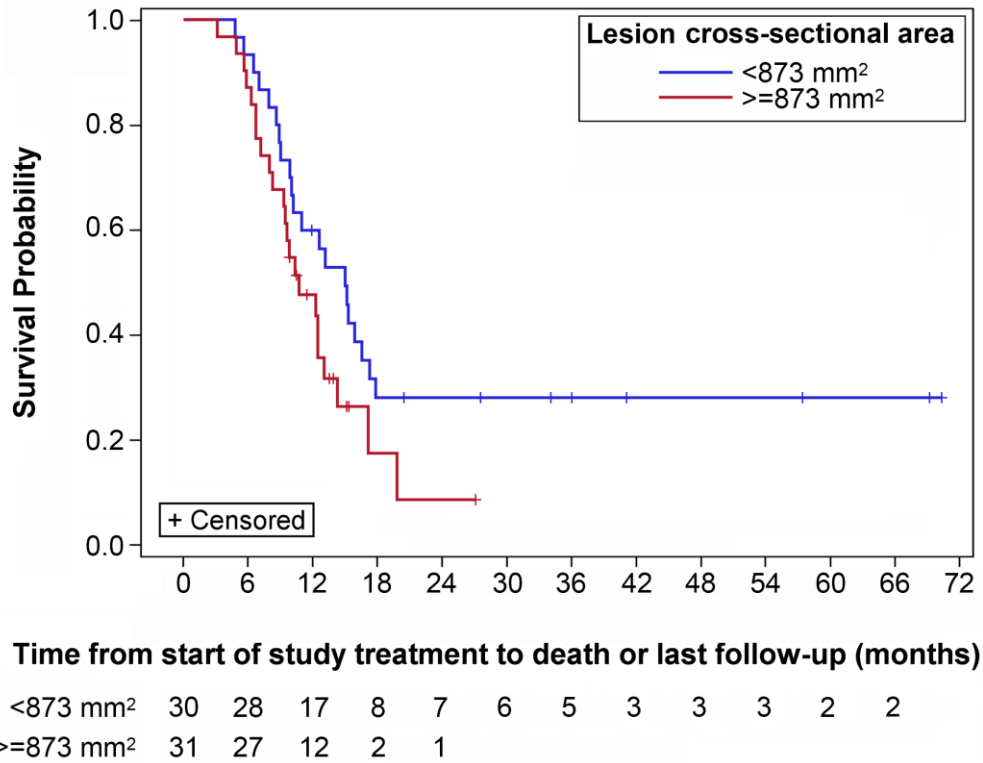

**Figure S4. Survival according to lesion cross-sectional area.**

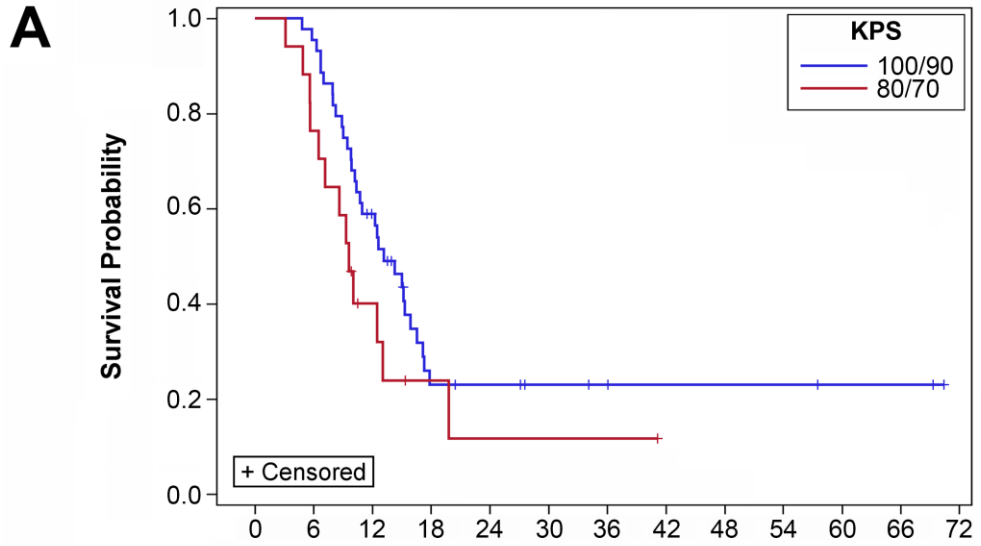

Time from start of study treatment to death or last follow-up (months)

|        |    |    |    |   |   |   |   |   |   |   |   |   |
|--------|----|----|----|---|---|---|---|---|---|---|---|---|
| 100/90 | 44 | 42 | 24 | 8 | 7 | 5 | 4 | 3 | 3 | 3 | 2 | 2 |
| 80/70  | 17 | 13 | 5  | 2 | 1 | 1 | 1 |   |   |   |   |   |

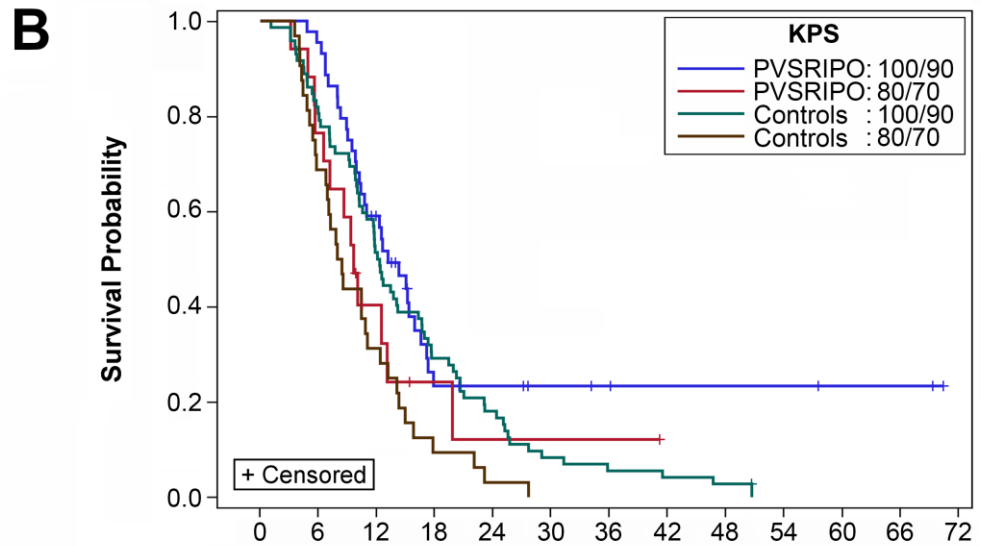

Time from start of study treatment to death or last follow-up (months)

|                  |    |    |    |    |    |   |   |   |   |   |   |   |
|------------------|----|----|----|----|----|---|---|---|---|---|---|---|
| PVSRIPO: 100/90  | 44 | 42 | 24 | 8  | 7  | 5 | 4 | 3 | 3 | 3 | 2 | 2 |
| PVSRIPO: 80/70   | 17 | 13 | 5  | 2  | 1  | 1 | 1 |   |   |   |   |   |
| Controls: 100/90 | 72 | 58 | 37 | 21 | 13 | 6 | 4 | 3 | 2 |   |   |   |
| Controls: 80/70  | 32 | 22 | 10 | 3  | 1  | 0 |   |   |   |   |   |   |

**Figure S5. Survival according to KPS. A.** PVSRIPO patients stratified by KPS level. **B.** PVSRIPO and historical control patients stratified by KPS level.

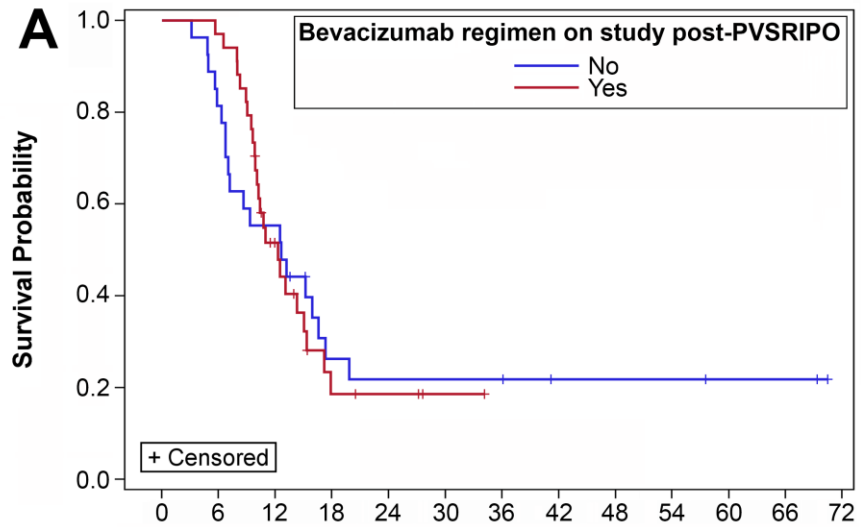

Time from start of study treatment to death or last follow-up (months)

|     |    |    |    |   |   |   |   |   |   |   |   |   |
|-----|----|----|----|---|---|---|---|---|---|---|---|---|
| No  | 27 | 22 | 15 | 6 | 5 | 5 | 5 | 3 | 3 | 3 | 2 | 2 |
| Yes | 34 | 33 | 14 | 4 | 3 | 1 |   |   |   |   |   |   |

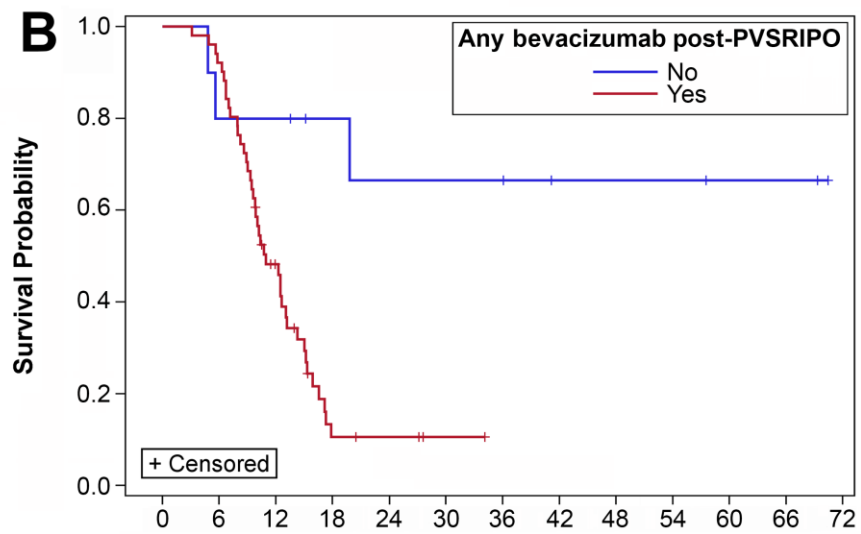

Time from start of study treatment to death or last follow-up (months)

|     |    |    |    |   |   |   |   |   |   |   |   |   |
|-----|----|----|----|---|---|---|---|---|---|---|---|---|
| No  | 10 | 8  | 8  | 6 | 5 | 5 | 5 | 3 | 3 | 3 | 2 | 2 |
| Yes | 51 | 47 | 21 | 4 | 3 | 1 |   |   |   |   |   |   |

**Figure S6. Survival according to bevacizumab use. A.** PVSRIPO patients receiving bevacizumab on study at 7.5 mg/kg IV every 3 weeks. **B.** PVSRIPO patients receiving any bevacizumab-containing regimen on study or not.

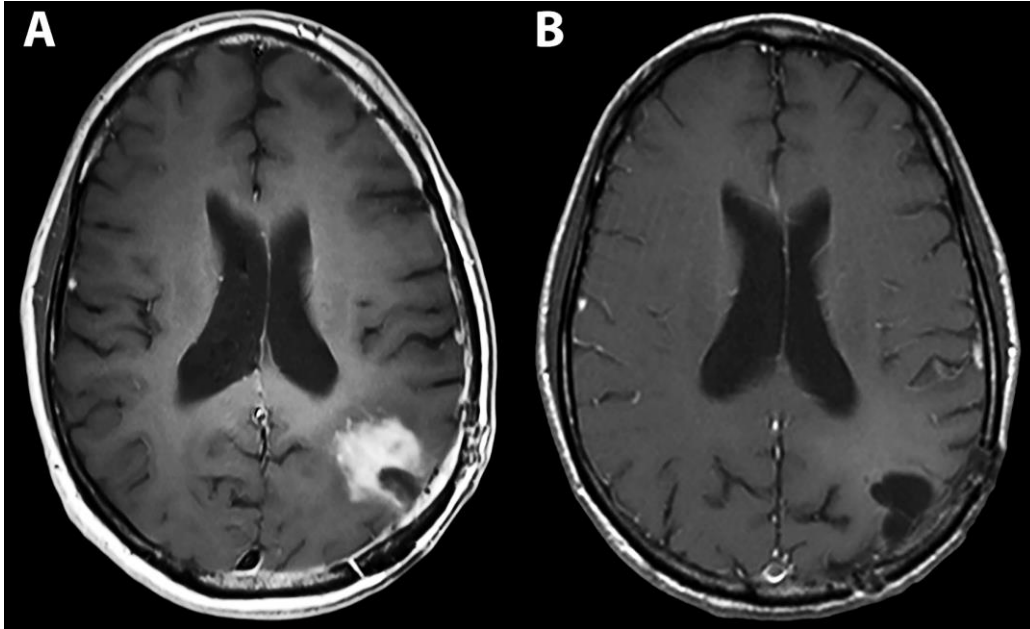

**Figure S7. MRIs from patient 50 (dose level -2).** Post-contrast axial T1 MRIs at baseline (**A**) and 9 months after PVSRIPO infusion (**B**), showing complete response.

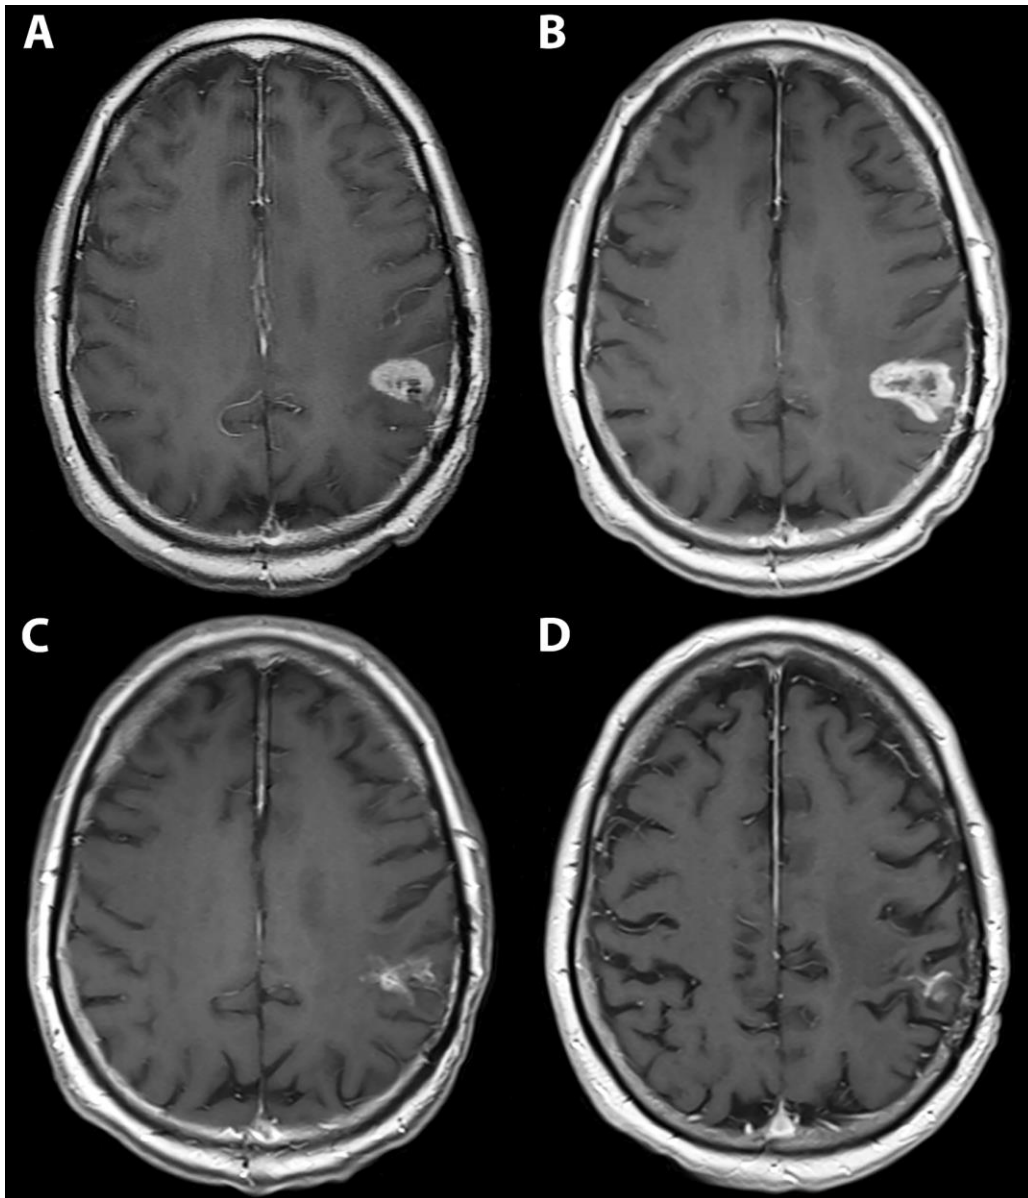

**Figure S8. MRIs from patient 2 (dose level 2).** **A.** Post-contrast axial T1 MRI at baseline. **B.** Increased tumor size and characteristic 'soap-bubble' appearance 4 months post PVSRIPO infusion. **C., D.** Tumor contraction 14 months (**C**) and 35 months (**D**) post infusion.

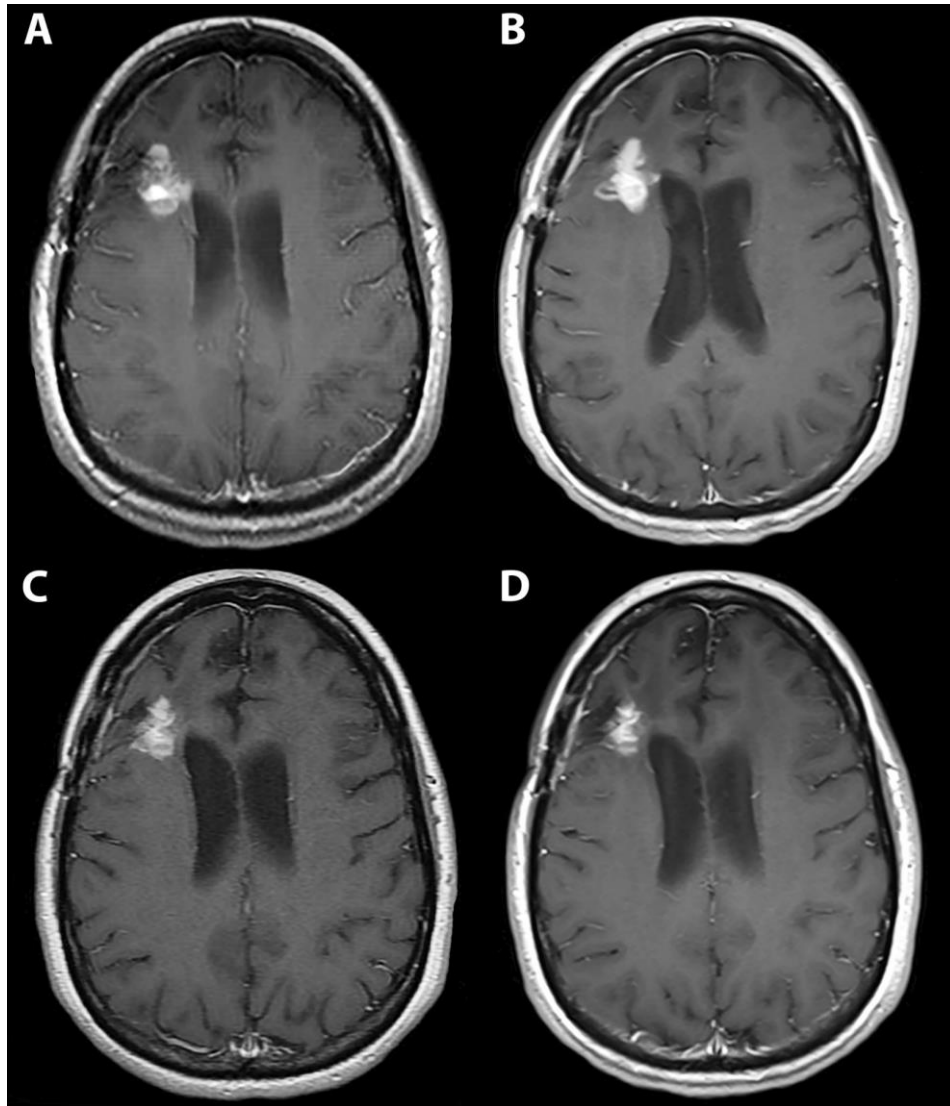

**Figure S9. MRIs from patient 22 (dose level -1).** **A.** Post-contrast axial T1 MRI at baseline. **B.** Enhanced tumor size and brightness 2 months post PVSRIPO infusion. **C., D.** Successive tumor contraction 12 months (**C**) and 22 months (**D**) post infusion.



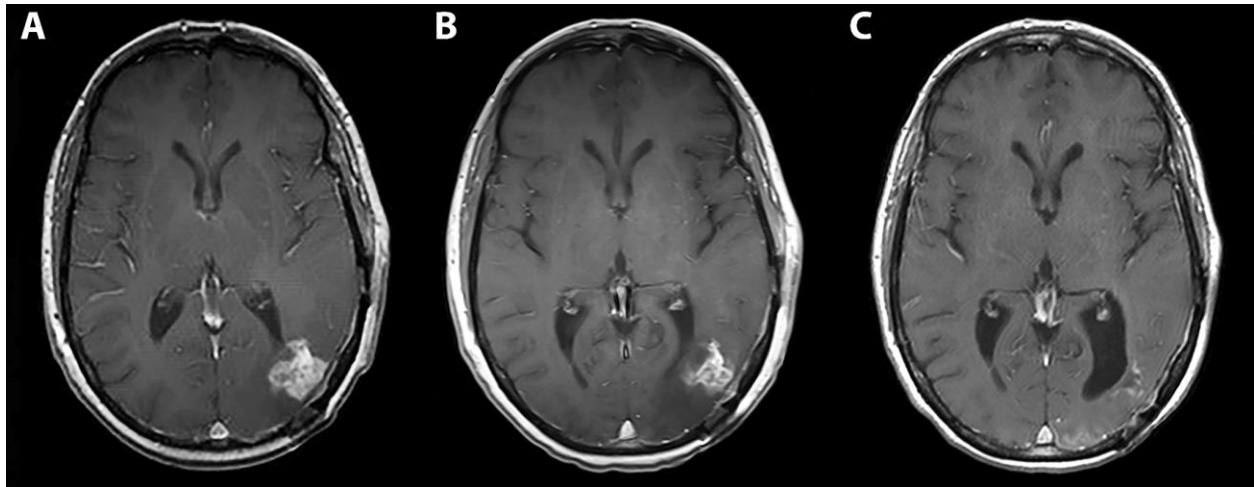

**Figure S10. MRIs from patient 16 (dose level -1).** **A.** Post-contrast axial T1 MRI at baseline. **B.** Initial tumor contraction and 'soap-bubble' appearance 1 month post infusion. **C.** Contraction of treated tumor 21 months post infusion.

**Patient 1**

**A**

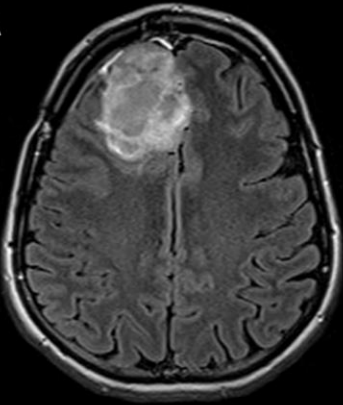

**B**

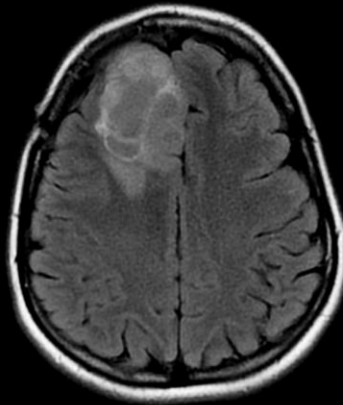

**C**

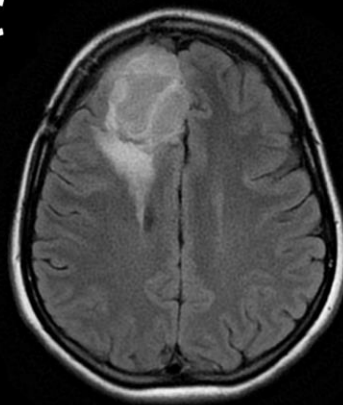

**D**

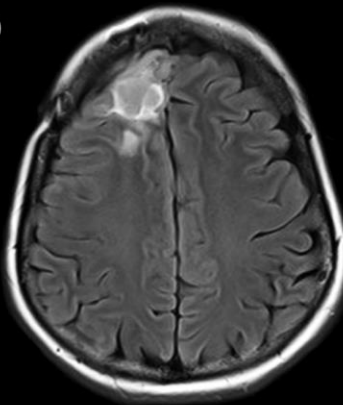

**E**

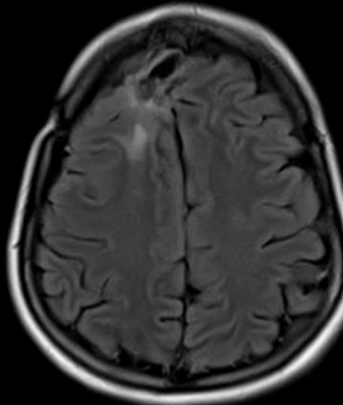

**F**

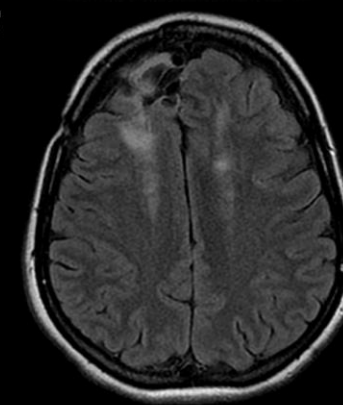

**Patient 2**

**A**

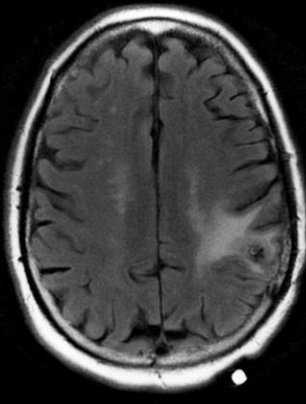

**B**

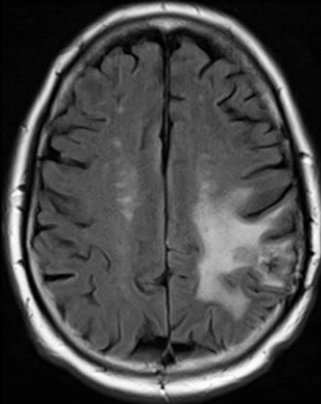

**C**

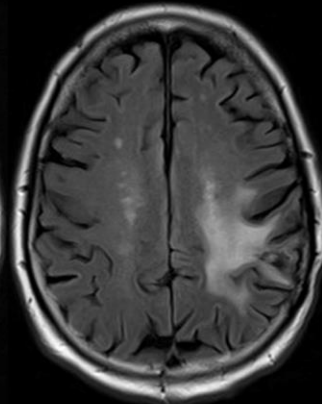

**D**

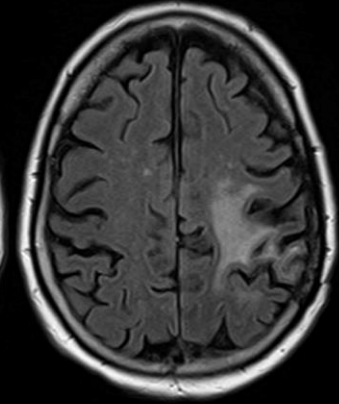

**Patient 8**

**A**

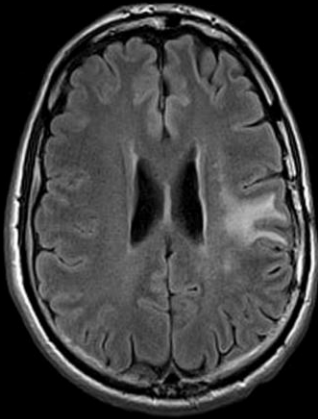

**B**

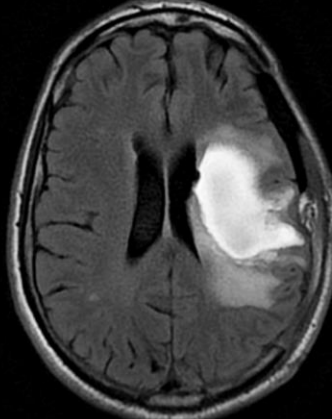

**C**

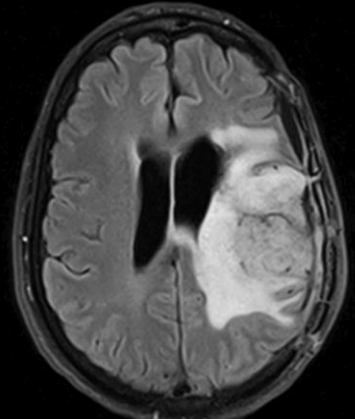

**D**

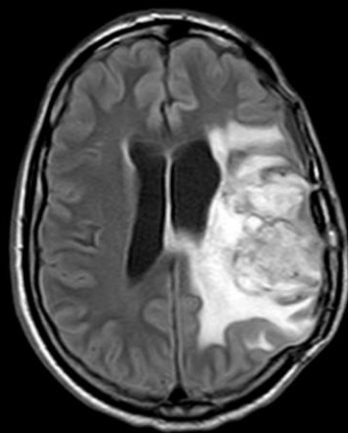

**E**

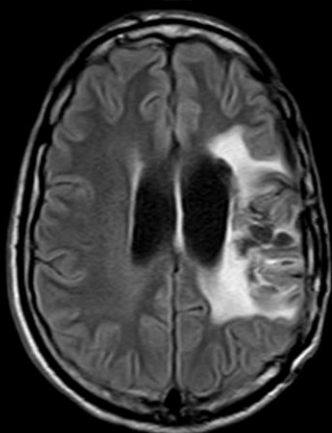

**F**

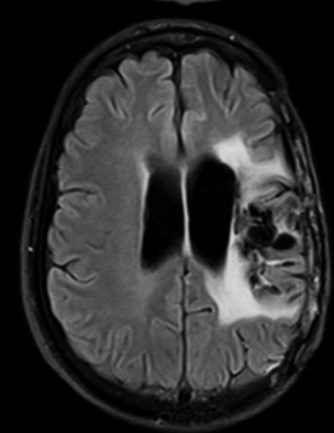

**Patient 16**

**A**

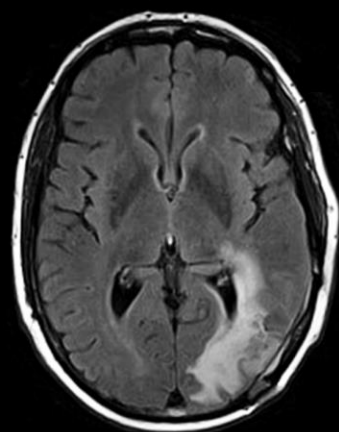

**B**

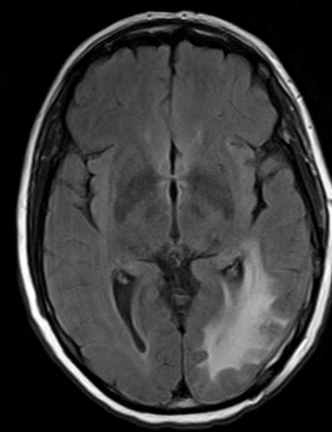

**C**

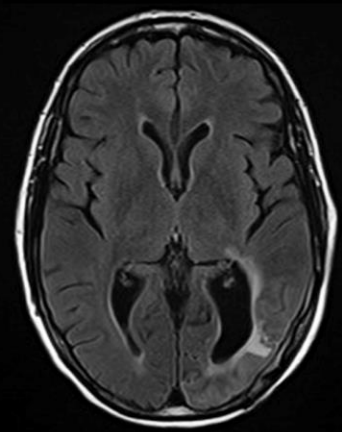

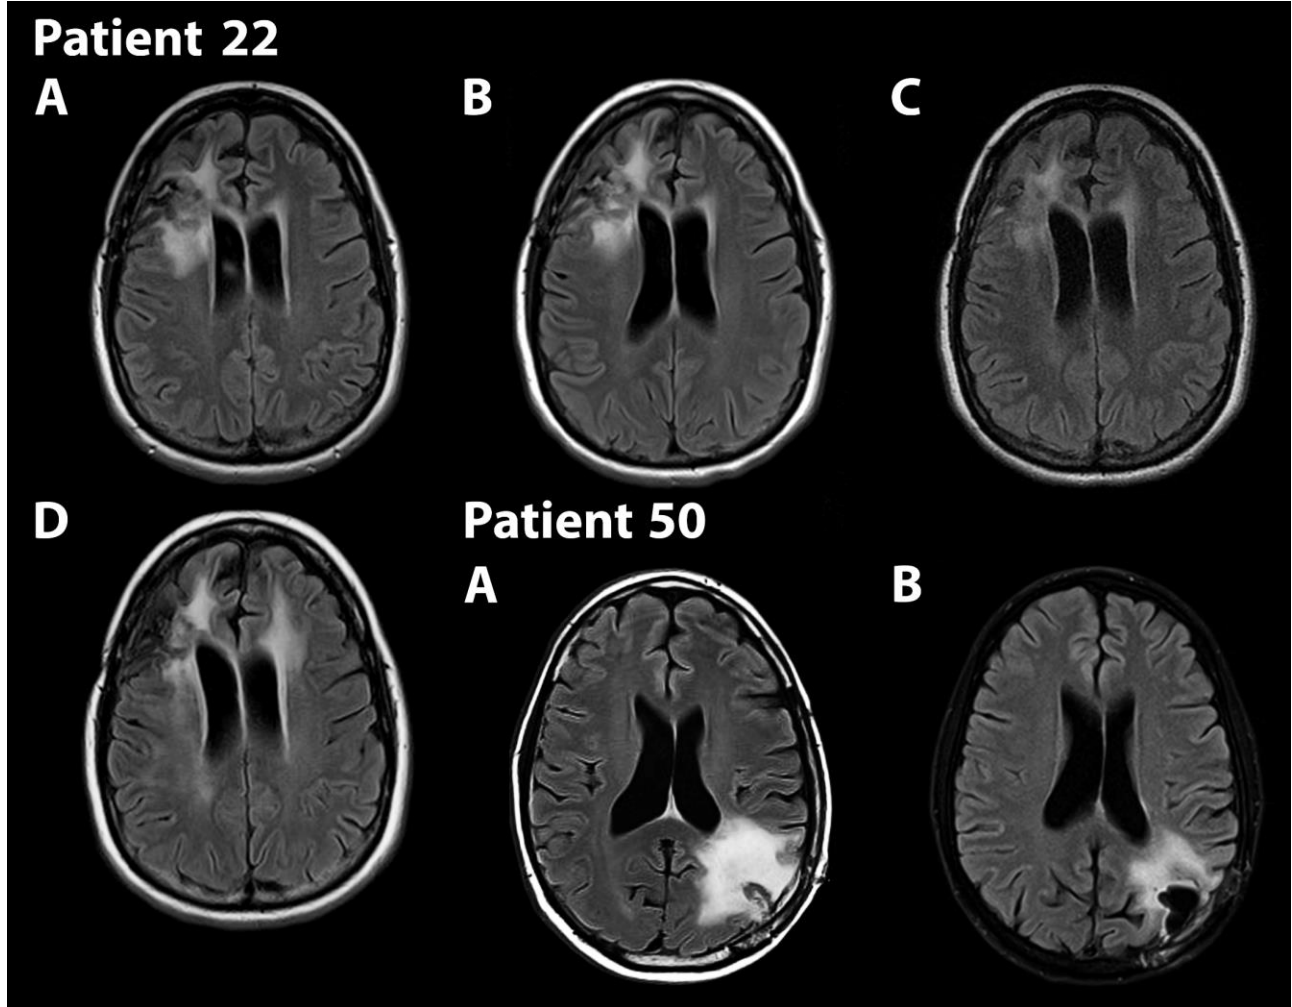

**Figure S11. Flair MRIs from patient 1, 2, 8, 16, 22 and 50.** Fluid attenuation inversion recovery (FLAIR) images from patients shown in Figure 2 (patient 1), Figure 3 (patient 8), Supplemental Figure S7 (patient 50), Supplemental Figure S8 (patient 2), Supplemental Figure S9 (patient 22), and Supplemental Figure S10 (patient 16). The labeled individual scans correspond to those in the post-contrast axial T1 MRIs shown in the referenced Figures/ Supplemental Figures.

## Supplementary References

1. Dobrikova EY, Goetz C, Walters RW, et al. Attenuation of neurovirulence, biodistribution, and shedding of a poliovirus:rhinovirus chimera after intrathalamic inoculation in *Macaca fascicularis*. *J Virol* 2012;86:2750-9.
2. Moller S. An extension of the continual reassessment methods using a preliminary up-and-down design in a dose finding study in cancer patients, in order to investigate a greater range of doses. *Stat Med* 1995;14:911-22; discussion 23.
3. Paoletti X, Baron B, Schoffski P, et al. Using the continual reassessment method: lessons learned from an EORTC phase I dose finding study. *Eur J Cancer* 2006;42:1362-8.
4. Simon R, Freidlin B, Rubinstein L, Ar buck SG, Collins J, Christian MC. Accelerated titration designs for phase I clinical trials in oncology. *J Natl Cancer Inst* 1997;89:1138-47.
5. O'Quigley J, Shen LZ. Continual reassessment method: a likelihood approach. *Biometrics* 1996;52:673-84.
6. Stupp R, Wong ET, Kanner AA, et al. NovoTTF-100A versus physician's choice chemotherapy in recurrent glioblastoma: a randomised phase III trial of a novel treatment modality. *Eur J Cancer* 2012;48:2192-202.
7. Holl EK, Brown MC, Boczkowski D, et al. Recombinant oncolytic poliovirus, PVSRIPO, has potent cytotoxic and innate inflammatory effects, mediating therapy in human breast and prostate cancer xenograft models. *Oncotarget* 2016;7:79828-41.
8. Brown MC, Holl EK, Boczkowski D, et al. Cancer immunotherapy with recombinant poliovirus induces IFN-dominant activation of dendritic cells and tumor antigen-specific CTLs. *Sci Transl Med* 2017;9.
9. Chandramohan V, Bryant JD, Piao H, et al. Validation of an Immunohistochemistry Assay for Detection of CD155, the Poliovirus Receptor, in Malignant Gliomas. *Arch Pathol Lab Med* 2017;141:1697-704.
10. Boone EJ, Albrecht P. Conventional and enhanced plaque neutralization assay for polio antibody. *J Virol Methods* 1983;6:193-202.
